# Supplementary material for: Targeted Mutations Produce Divergent Characteristics in Pedigreed Sake Yeast Strains
Source: Microorganisms. 2023 May 12;11(5):1274. doi: 10.3390/microorganisms11051274 (PMC10222758; doi:10.3390/microorganisms11051274)
Supplement: Supplementary file 1 [file microorganisms-11-01274-s001.zip › GE TableS1-S10_230511_nora.xlsx]

## Sheet: Table S1
Table S1. Yeast strains used in this study
Name	Genotype	Source
Saccharomyces cerevisiae
K6	Sake yeast MATa/α	The Brewing Society of Japan.
K7	Sake yeast MATa/α	The Brewing Society of Japan.
K9	Sake yeast MATa/α	The Brewing Society of Japan.
K10	Sake yeast MATa/α	The Brewing Society of Japan.
K6GE01	Sake yeast MATa/α, awa1Δ/awa1Δ	Ohnuki et al., 2019 [7]
K7GE01	Sake yeast MATa/α, awa1Δ/awa1Δ	Ohnuki et al., 2019 [7]
K9GE01	Sake yeast MATa/α, awa1Δ/awa1Δ	Ohnuki et al., 2019 [7]
K10GE01	Sake yeast MATa/α, awa1Δ/awa1Δ	Ohnuki et al., 2019 [7]
K6GE21	Sake yeast MATa/α, awa1Δ /awa1Δ, car1Δ/car1Δ	This study
K7GE21	Sake yeast MATa/α, awa1Δ /awa1Δ, car1Δ/car1Δ	Chadani et al., 2021 [15]
K9GE21	Sake yeast MATa/α, awa1Δ /awa1Δ, car1Δ/car1Δ	This study
K10GE21	Sake yeast MATa/α, awa1Δ /awa1Δ, car1Δ/car1Δ	This study
K6GE31	Sake yeast MATa/α, awa1Δ /awa1Δ, car1Δ/car1Δ, mde1Δ/mde1Δ	This study
K7GE31	Sake yeast MATa/α, awa1Δ /awa1Δ, car1Δ/car1Δ, mde1Δ/mde1Δ	Chadani et al., 2021 [15]
K9GE31	Sake yeast MATa/α, awa1Δ /awa1Δ, car1Δ/car1Δ, mde1Δ/mde1Δ	This study
K10GE31	Sake yeast MATa/α, awa1Δ /awa1Δ, car1Δ/car1Δ, mde1Δ/mde1Δ	This study
K6GE41	Sake yeast MATa/α, awa1Δ/awa1Δ, car1Δ/car1Δ, mde1Δ/mde1Δ, FAS2 (G1250S)/FAS2 (G1250S)	This study
K7GE41	Sake yeast MATa/α, awa1Δ/awa1Δ, car1Δ/car1Δ, mde1Δ/mde1Δ, FAS2 (G1250S)/FAS2 (G1250S)	Chadani et al., 2021 [15]
K9GE41	Sake yeast MATa/α, awa1Δ/awa1Δ, car1Δ/car1Δ, mde1Δ/mde1Δ, FAS2 (G1250S)/FAS2 (G1250S)	This study
K10GE41	Sake yeast MATa/α, awa1Δ/awa1Δ, car1Δ/car1Δ, mde1Δ/mde1Δ, FAS2 (G1250S)/FAS2 (G1250S)	This study
K6GE41-1	Sake yeast MATa/α, awa1Δ/awa1Δ, car1Δ/car1Δ, mde1Δ/mde1Δ, FAS2 (G1250S)/FAS2 (G1250S)	This study
K7GE41-1	Sake yeast MATa/α, awa1Δ/awa1Δ, car1Δ/car1Δ, mde1Δ/mde1Δ, FAS2 (G1250S)/FAS2 (G1250S)	This study
K9GE41-1	Sake yeast MATa/α, awa1Δ/awa1Δ, car1Δ/car1Δ, mde1Δ/mde1Δ, FAS2 (G1250S)/FAS2 (G1250S)	This study
K10GE41-1	Sake yeast MATa/α, awa1Δ/awa1Δ, car1Δ/car1Δ, mde1Δ/mde1Δ, FAS2 (G1250S)/FAS2 (G1250S)	This study

## Sheet: Table S2
Table S2. Design matrix to detect significant high-dimensional morphological changes.
Strain	K7	K7:K7GE01	K7GE01:K7GE21	K7GE21:K7GE31	K7GE31:K7GE41	K7:K6	K6:K6GE01	K6GE01:K6GE21	K6GE21:K6GE31	K6GE31:K6GE41	K7:K9	K9:K9GE01	K9GE01:K9GE21	K9GE21:K9GE31	K9GE31:K9GE41	K7:K10	K10:K10GE01	K10GE01:K10GE21	K10GE21:K10GE31	K10GE31:K10GE41
K7	1	0	0	0	0	0	0	0	0	0	0	0	0	0	0	0	0	0	0	0
K7GE01	1	1	0	0	0	0	0	0	0	0	0	0	0	0	0	0	0	0	0	0
K7GE21	1	1	1	0	0	0	0	0	0	0	0	0	0	0	0	0	0	0	0	0
K7GE31	1	1	1	1	0	0	0	0	0	0	0	0	0	0	0	0	0	0	0	0
K7GE41	1	1	1	1	1	0	0	0	0	0	0	0	0	0	0	0	0	0	0	0
K6	1	0	0	0	0	1	0	0	0	0	0	0	0	0	0	0	0	0	0	0
K6GE01	1	0	0	0	0	1	1	0	0	0	0	0	0	0	0	0	0	0	0	0
K6GE21	1	0	0	0	0	1	1	1	0	0	0	0	0	0	0	0	0	0	0	0
K6GE31	1	0	0	0	0	1	1	1	1	0	0	0	0	0	0	0	0	0	0	0
K6GE41	1	0	0	0	0	1	1	1	1	1	0	0	0	0	0	0	0	0	0	0
K9	1	0	0	0	0	0	0	0	0	0	1	0	0	0	0	0	0	0	0	0
K9GE01	1	0	0	0	0	0	0	0	0	0	1	1	0	0	0	0	0	0	0	0
K9GE21	1	0	0	0	0	0	0	0	0	0	1	1	1	0	0	0	0	0	0	0
K9GE31	1	0	0	0	0	0	0	0	0	0	1	1	1	1	0	0	0	0	0	0
K9GE41	1	0	0	0	0	0	0	0	0	0	1	1	1	1	1	0	0	0	0	0
K10	1	0	0	0	0	0	0	0	0	0	0	0	0	0	0	1	0	0	0	0
K10GE01	1	0	0	0	0	0	0	0	0	0	0	0	0	0	0	1	1	0	0	0
K10GE21	1	0	0	0	0	0	0	0	0	0	0	0	0	0	0	1	1	1	0	0
K10GE31	1	0	0	0	0	0	0	0	0	0	0	0	0	0	0	1	1	1	1	0
K10GE41	1	0	0	0	0	0	0	0	0	0	0	0	0	0	0	1	1	1	1	1

## Sheet: Table S3
Table S3. Z-value of Wald test by one-way ANOVA for PC scores.
Strain	PC1	PC2	PC3	PC4	PC5	PC6	PC7	PC8
K07GE01	-5.17375	2.02511	1.78594	-3.42804	-0.586336	-1.56589	1.55344	-0.697598
K07GE21	-2.10304	1.07302	1.85089	9.38793	-2.50411	0.905032	-3.42	7.16217
K07GE31	3.03976	-1.23711	-0.260006	-8.79302	2.4357	2.06169	-0.198414	-5.95669
K07GE41	51.603	-20.725	-8.77909	2.59851	2.05686	-2.08004	1.83679	-0.168716
K06GE01	-6.40182	-1.24606	2.8934	-1.73003	-4.32541	-1.7636	1.80748	-4.35045
K06GE21	-0.805235	1.59956	0.170935	2.32182	-3.98699	-5.09187	9.8574	0.588927
K06GE31	1.40989	-5.69485	1.4602	-2.04354	5.69526	2.44138	-9.36302	-2.28809
K06GE41	23.6086	29.2887	-12.8556	-5.71307	-6.13165	0.289692	-3.16095	2.59942
K09GE01	-4.15249	2.17381	-1.43307	-0.068724	0.570221	7.7596	3.58245	2.36584
K09GE21	2.93443	-4.02459	2.64909	-4.01672	-5.13488	-7.67931	-4.06373	0.739179
K09GE31	-0.968228	-0.987047	-5.97876	0.501048	1.72298	9.7645	4.38952	-0.347896
K09GE41	17.5965	12.4392	10.0656	-4.64882	12.7396	-2.772	2.67935	6.43482
K10GE01	-5.3455	-18.284	-0.406715	-6.02936	-5.31464	2.19379	-2.57719	8.06292
K10GE21	-2.36524	8.43238	0.0719366	10.2718	1.80785	-3.08793	-2.47088	-3.65363
K10GE31	-4.78153	-4.79523	-3.18479	-7.64671	-0.0272375	-3.58202	3.50826	2.36023
K10GE41	34.439	3.43763	17.7167	-1.76615	-8.97751	5.54179	0.729109	-0.894388

## Sheet: Table S4
Table S4. Q-value of Wald test by one-way ANOVA for PC scores. Yellow indicates significant at FDR = 0.01.
Strain	PC1	PC2	PC3	PC4	PC5	PC6	PC7	PC8
K07GE01	0.0349043	0.222712	0.1827	0.0692999	0.289653	0.134706	0.164027	0.267022
K07GE21	0.200551	0.295507	0.175514	1.98627e-05	0.0525832	0.235926	0.0262095	2.29561e-07
K07GE31	0.129942	0.289653	0.351514	6.08133e-05	0.0569165	0.0820561	0.351514	1.15555e-05
K07GE41	1.00008e-37	3.88328e-11	1.97883e-05	0.123847	0.0824549	0.0820561	0.131349	0.351514
K06GE01	0.0186361	0.289847	0.101789	0.216092	0.00448794	0.130435	0.149257	0.00218222
K06GE21	0.316883	0.267022	0.363601	0.158986	0.00828269	0.000837573	8.06975e-08	0.289653
K06GE31	0.270823	0.0468577	0.231545	0.1843	0.000230204	0.068735	2.61134e-07	0.068735
K06GE41	2.0261e-13	4.94874e-16	3.13991e-08	0.0119211	7.67725e-05	0.338971	0.0477925	0.0477925
K09GE01	0.0820561	0.222712	0.233216	0.373837	0.295507	1.04848e-06	0.0307803	0.0630005
K09GE21	0.149257	0.104925	0.122817	0.0569165	0.000823837	1.26483e-06	0.0154569	0.267022
K09GE31	0.302769	0.307664	0.00559333	0.335197	0.134706	3.45724e-09	0.00959133	0.328103
K09GE41	7.4028e-09	6.89668e-05	7.78467e-06	0.0348595	2.05144e-13	0.0477925	0.074313	1.15555e-05
K10GE01	0.0429051	2.95159e-08	0.338971	0.00856719	0.000552967	0.0839268	0.0820561	8.59783e-08
K10GE21	0.193325	0.00559333	0.373837	1.7757e-05	0.128058	0.0329726	0.0853553	0.00893383
K10GE31	0.0596425	0.0733687	0.0820561	0.00101812	0.374686	0.0154569	0.0329726	0.0630005
K10GE41	3.4441e-22	0.134706	4.55263e-13	0.213507	3.57702e-08	0.000307533	0.289653	0.238599

## Sheet: Table S5
Table S5. Number of parameters detected to have significant correlation with each PC of the second PCA at P < 0.05 after Bonferroni correction.
		1st PCA
		PC1	PC2	PC3	PC4	PC5	PC6	PC7	PC8
2nd PCA	PC1	47	32	4	4	2	2	2	2
	PC2	25	8	2	-	1	2	-	2
	PC3	2	1	3	-	-	-	-	-
	PC4	1	0	2	-	-	-	-	-
	PC5	4	-	-	-	-	-	-	-

## Sheet: Table S6
Table S6. Loadings of morphological parameters in the first and second PCAs
PC1					PC2
PC space	CalMorph ID	Loading	P value	q value	PC space	Loading	P value	Description
PC1	D103_C	0.981515	1.88326e-11	7.54809e-08	PC1	-0.84827	3.39587e-11	Distance_between_nuclear_gravity_center_in_mother_and_mother_tip
PC1	D125_C	0.978739	4.97793e-11	9.97578e-08	PC1	-0.835675	1.23331e-10	Distance_between_nuclear_gravity_center_in_mother_and_mother_hip
PC1	D128_C	0.972544	2.9332e-10	2.93907e-07	PC1	-0.817547	6.60373e-10	Distance_between_nuclear_brightest_point_in_mother_and_mother_tip
PC1	D145_C	0.96868	7.29777e-10	5.10134e-07	PC1	-0.672354	5.17326e-06	Distance_between_nuclear_outline_point_D7_in_mother_and_mother_hip
PC1	D141_C	0.968473	7.63674e-10	5.10134e-07	PC1	-0.85156	2.37852e-11	Distance_between_nuclear_brightest_point_in_mother_and_mother_hip
PC1	D14-1_C	0.960818	3.42719e-09	1.96231e-06	PC1	-0.815319	8.01281e-10	Nuclear_size_in_mother
PC1	D179_C	0.959696	4.16329e-09	2.08581e-06	PC1	-0.753724	7.249e-08	Nuclear_minimum_radius_in_mother
PC1	D14-3_C	0.95508	8.78538e-09	3.52118e-06	PC1	-0.783056	1.01705e-08	Nuclear_size_in_whole_cell
PC1	CCV107_C	0.951965	1.39294e-08	4.65243e-06	PC1	-0.880999	6.34529e-13	Noise_of_long_axis_length_in_bud
PC1	D176_C	0.945581	3.27989e-08	8.21613e-06	PC1	-0.827968	2.57739e-10	Nuclear_long_axis_length_in_mother
PC1	CCV11-2_C	0.9444	3.79977e-08	8.95851e-06	PC1	-0.852916	2.04875e-11	Noise_of_bud_cell_size
PC1	D173_C	0.940643	5.94486e-08	1.32372e-05	PC1	-0.828966	2.34753e-10	Maximal_distance_between_nuclear_gravity_center_and_nuclear_outline_in_mother
PC1	D181_A1B	0.932396	1.44552e-07	2.41402e-05	PC1	-0.837357	1.04478e-10	Nuclear_minimum_radius
PC1	C11-1_C	0.927674	2.28947e-07	3.39859e-05	PC1	-0.656739	1.0126e-05	Mother_cell_size
PC1	C104_C	0.92667	2.51455e-07	3.59941e-05	PC1	-0.628659	3.09002e-05	Short_axis_length_in_mother
PC1	C124_C	0.919025	4.93104e-07	6.58787e-05	PC1	-0.774992	1.79641e-08	Medium_bud_ratio
PC1	C12-1_C	0.911342	9.10862e-07	0.000110628	PC1	-0.684702	2.95541e-06	Mother_cell_outline_length
PC1	D106_C	0.90781	1.18585e-06	0.000132024	PC1	-0.69043	2.25856e-06	Ratio_of_D103_to_C103
PC1	CCV12-2_C	0.904182	1.53839e-06	0.000158099	PC1	-0.864221	5.55355e-12	Noise_of_bud_cell_outline_length
PC1	D15-3_A1B	0.900661	1.96155e-06	0.000196547	PC1	-0.629399	3.00479e-05	Nuclear_brightness
PC1	D14-3_A1B	0.896324	2.61433e-06	0.00024368	PC1	-0.816317	7.35036e-10	Nuclear_size
PC1	C104_A1B	0.893269	3.17705e-06	0.000276818	PC1	-0.608223	6.51333e-05	Short_axis_length_in_mother
PC1	D15-1_C	0.890983	3.66195e-06	0.000312279	PC1	-0.712382	7.59665e-07	Nuclear_brightness_in_mother
PC1	C11-1_A1B	0.888546	4.2464e-06	0.000347338	PC1	-0.607742	6.62464e-05	Mother_cell_size
PC1	C103_C	0.884849	5.28223e-06	0.000407138	PC1	-0.632975	2.62184e-05	Long_axis_length_in_mother
PC1	CCV108_C	0.881689	6.32912e-06	0.000469762	PC1	-0.671402	5.3957e-06	Noise_of_short_axis_length_in_bud
PC1	DCV15-2_C	0.881201	6.50512e-06	0.000474046	PC1	-0.718408	5.53466e-07	Noise_of_nuclear_brightness_in_bud
PC1	D175_A1B	0.872739	1.02869e-05	0.000694293	PC1	-0.800722	2.67805e-09	Maximal_distance_between_nuclear_gravity_center_and_nuclear_outline
PC1	D178_A1B	0.872542	1.03936e-05	0.000694293	PC1	-0.79889	3.09418e-09	Nuclear_long_axis_length
PC1	D189_C	0.869067	1.24268e-05	0.000794529	PC1	-0.786238	8.07198e-09	Distance_between_nuclear_gravity_center_and_brightest_point_in_bud
PC1	D17-2_C	0.860522	1.88911e-05	0.00116486	PC1	-0.743143	1.37909e-07	Nuclear_fitness_for_ellipse_in_bud
PC1	DCV180_C	0.854078	2.54547e-05	0.00145747	PC1	-0.756455	6.10813e-08	Noise_of_nuclear_minimum_radius_in_bud
PC1	C12-1_A1B	0.852416	2.7428e-05	0.00148556	PC1	-0.610902	5.92423e-05	Mother_cell_outline_length
PC1	DCV186_C	0.840657	4.53901e-05	0.00227404	PC1	-0.63941	2.04248e-05	Noise_of_total_length_of_two_straight_segments_D12-1C4-1_and_D12-2C4-1
PC1	D151_C	0.828895	7.22974e-05	0.0032089	PC1	-0.713093	7.32117e-07	Ratio_of_distance_between_each_nucleus_and_middle_point_of_neck
PC1	D203	0.822006	9.34711e-05	0.00382278	PC1	-0.654352	1.11828e-05	Nuclear_D_ratio
PC1	DCV185_C	0.804653	0.000170652	0.00610691	PC1	-0.611538	5.79159e-05	Noise_of_total_length_of_two_straight_segments_D11-1C4-1_and_D11-2C4-1
PC1	D188_C	0.780046	0.000364925	0.0111706	PC1	-0.820134	5.25758e-10	Distance_between_nuclear_gravity_center_and_brightest_point_in_mother
PC1	DCV14-2_C	0.774258	0.000430466	0.0126169	PC1	-0.719797	5.13898e-07	Noise_of_nuclear_size_in_bud
PC1	D190_A1B	0.717969	0.00173529	0.0347751	PC1	-0.721067	4.80035e-07	Distance_between_nuclear_gravity_center_and_brightest_point
PC1	D195_C	-0.721519	0.00160477	0.0330762	PC1	0.652631	1.20065e-05	Maximal_intensity_of_nuclear_brightness_divided_by_average_in_bud
PC1	D182_C	-0.764948	0.000556049	0.0151609	PC1	0.621961	3.96842e-05	Nuclear_axis_ratio_in_mother
PC1	D183_C	-0.825934	8.08428e-05	0.00341071	PC1	0.726682	3.53523e-07	Nuclear_axis_ratio_in_bud
PC1	D112_C	-0.908178	1.15426e-06	0.000132024	PC1	0.742346	1.44574e-07	Ratio_of_D108_to_C128
PC1	C118_C	-0.935813	1.01468e-07	1.76819e-05	PC1	0.706292	1.03792e-06	Cell_size_ratio
PC1	C125_C	-0.939413	6.84051e-08	1.43047e-05	PC1	0.809785	1.28154e-09	Large_bud_ratio
PC1	C117_C	-0.948093	2.37204e-08	6.79083e-06	PC1	0.727422	3.39376e-07	Cell_outline_ratio
PC1	C109_A1B	0.950364	1.74495e-08	5.37981e-06	PC2	-0.613669	5.36667e-05	Neck_width
PC1	C109_C	0.937996	8.01152e-08	1.52906e-05	PC2	-0.750863	8.65292e-08	Neck_width
PC1	C11-1_C	0.927674	2.28947e-07	3.39859e-05	PC2	-0.709427	8.84734e-07	Mother_cell_size
PC1	C104_C	0.92667	2.51455e-07	3.59941e-05	PC2	-0.73356	2.40558e-07	Short_axis_length_in_mother
PC1	C12-1_C	0.911342	9.10862e-07	0.000110628	PC2	-0.639219	2.05788e-05	Mother_cell_outline_length
PC1	C104_A1B	0.893269	3.17705e-06	0.000276818	PC2	-0.725153	3.84519e-07	Short_axis_length_in_mother
PC1	C11-1_A1B	0.888546	4.2464e-06	0.000347338	PC2	-0.740361	1.62483e-07	Mother_cell_size
PC1	C128_C	0.885261	5.1571e-06	0.000407138	PC2	-0.778987	1.35921e-08	Distance_between_middle_point_of_neck_and_mother_hip
PC1	C112_C	0.885114	5.20141e-06	0.000407138	PC2	-0.709032	9.0282e-07	Distance_between_middle_point_of_neck_and_mother_center
PC1	C103_C	0.884849	5.28223e-06	0.000407138	PC2	-0.640946	1.92269e-05	Long_axis_length_in_mother
PC1	C12-1_A1B	0.852416	2.7428e-05	0.00148556	PC2	-0.717079	5.93894e-07	Mother_cell_outline_length
PC1	C112_A1B	0.851293	2.8832e-05	0.00154078	PC2	-0.790492	5.8903e-09	Distance_between_middle_point_of_neck_and_mother_center
PC1	C101_A1B	0.847874	3.34826e-05	0.00174283	PC2	-0.830762	1.98143e-10	Whole_cell_size
PC1	C128_A1B	0.842174	4.26311e-05	0.00216285	PC2	-0.79764	3.41197e-09	Distance_between_middle_point_of_neck_and_mother_hip
PC1	C101_C	0.828997	7.20147e-05	0.0032089	PC2	-0.827099	2.7943e-10	Whole_cell_size
PC1	C103_A1B	0.827707	7.56289e-05	0.00329479	PC2	-0.709964	8.607e-07	Long_axis_length_in_mother
PC1	C102_A1B	0.743956	0.000952034	0.0221846	PC2	-0.825821	3.14431e-10	Whole_cell_outline_length
PC1	C102_C	0.727913	0.0013899	0.02979	PC2	-0.808653	1.40804e-09	Whole_cell_outline_length
PC1	C108_A1B	0.725575	0.00146554	0.031057	PC2	-0.794223	4.44142e-09	Short_axis_length_in_bud
PC1	D129_A1B	0.712189	0.00196616	0.0386197	PC2	-0.615903	4.95162e-05	Distance_between_nuclear_brightest_point_and_mother_tip
PC1	A101_C	-0.709293	0.00209087	0.0400967	PC2	0.650468	1.31195e-05	Actin_region_ratio_in_whole_cell
PC1	D108_C	-0.716269	0.00180077	0.0359079	PC2	-0.726351	3.60031e-07	Distance_between_nuclear_gravity_center_in_mother_and_middle_point_of_neck
PC1	D143_C	-0.794812	0.000234068	0.00775536	PC2	-0.627244	3.25931e-05	Distance_between_nuclear_outline_point_D6-1_in_mother_and_middle_point_of_neck
PC1	C13_A1B	-0.856804	2.2477e-05	0.00132482	PC2	0.690615	2.23883e-06	Mother_cell_fitness_for_ellipse
PC1	C13_C	-0.911829	8.77596e-07	0.000109919	PC2	0.681689	3.39651e-06	Mother_cell_fitness_for_ellipse
PC1	D132_A1B	0.853259	2.6411e-05	0.00148556	PC3	0.654333	1.11919e-05	Distance_between_nuclear_brightest_point_and_middle_point_of_neck
PC1	D110_A1B	0.816161	0.000115269	0.00452319	PC3	0.663265	7.68434e-06	Distance_between_nuclear_gravity_center_and_middle_point_of_neck
PC1	ACV7-2_A1B	0.808384	0.000150693	0.00564467	PC4	0.656552	1.02052e-05	Noise_of_size_of_actin_region_in_bud
PC1	D121_C	0.876763	8.30694e-06	0.000594505	PC5	-0.737538	1.91502e-07	Distance_between_nuclear_gravity_center_in_bud_and_bud_tip
PC1	D123_C	0.833716	5.99968e-05	0.00279613	PC5	-0.78106	1.17344e-08	Ratio_of_D121_to_C107
PC1	D146_C	0.803211	0.000178934	0.00634661	PC5	-0.61616	4.90589e-05	Distance_between_nuclear_outline_point_D8_in_bud_and_bud_tip
PC1	D113_C	-0.825388	8.25098e-05	0.00343711	PC5	0.725087	3.85919e-07	Ratio_of_D109_to_C107
PC2	D114_A1B	0.744538	0.000938574	0.0221464	PC1	0.578316	0.00017757	Ratio_of_D110_to_C128
PC2	D142_A1B	-0.699742	0.00254846	0.0458037	PC1	-0.866198	4.36752e-12	Distance_between_nuclear_brightest_point_and_mother_hip
PC2	D116_C	-0.700203	0.00252464	0.04558	PC1	-0.623445	3.75641e-05	Distance_between_two_nuclear_gravity_centers_through_middle_point_of_neck
PC2	D144_C	-0.703434	0.00236283	0.0434414	PC1	-0.724648	3.95289e-07	Distance_between_nuclear_outline_point_D6-2_in_bud_and_middle_point_of_neck
PC2	D145_A1B	-0.707945	0.00215106	0.0406672	PC1	-0.76807	2.8746e-08	Distance_between_nuclear_outline_point_D7_and_mother_hip
PC2	C11-1_A	-0.715852	0.00181714	0.036055	PC1	-0.824293	3.61652e-10	Whole_cell_size
PC2	D126_A1B	-0.718083	0.00173096	0.0347751	PC1	-0.868035	3.48162e-12	Distance_between_nuclear_gravity_center_and_mother_hip
PC2	D150_C	-0.725147	0.00147976	0.031057	PC1	-0.683163	3.17365e-06	Relative_distance_of_nuclear_brightest_point_in_bud_to_bud_center
PC2	D185_C	-0.744115	0.000948346	0.0221846	PC1	-0.799439	2.96371e-09	Total_length_of_two_straight_segments_D11-1C4-1_and_D11-2C4-1
PC2	D109_C	-0.746758	0.000888689	0.0217579	PC1	-0.770902	2.37627e-08	Distance_between_nuclear_gravity_center_in_bud_and_middle_point_of_neck
PC2	D134_C	-0.747063	0.000882013	0.0217579	PC1	-0.606572	6.90244e-05	Distance_between_two_nuclear_brightest_points_through_middle_point_of_neck
PC2	C12-1_A	-0.754726	0.000727175	0.0185638	PC1	-0.78588	8.28658e-09	Whole_cell_outline_length
PC2	D186_C	-0.756738	0.00069046	0.0181971	PC1	-0.774519	1.85602e-08	Total_length_of_two_straight_segments_D12-1C4-1_and_D12-2C4-1
PC2	C11-2_A1B	-0.75752	0.00067662	0.0179596	PC1	-0.637203	2.22658e-05	Bud_cell_size
PC2	D135_C	-0.772585	0.000451113	0.0130881	PC1	-0.636016	2.33164e-05	Distance_between_nuclear_brightest_point_in_mother_and_mother_center
PC2	D148_A1B	-0.774383	0.000428947	0.0126169	PC1	-0.747088	1.08902e-07	Relative_distance_of_nuclear_brightest_point_to_mother_center
PC2	DCV108_C	-0.781181	0.000353104	0.0109709	PC1	-0.593718	0.00010726	Noise_of_distance_between_nuclear_gravity_center_in_mother_and_middle_point_of_neck
PC2	DCV130_C	-0.796438	0.000222416	0.0075546	PC1	-0.697338	1.61964e-06	Noise_of_distance_between_nuclear_brightest_point_in_mother_and_middle_point_of_neck
PC2	D117_A	-0.799614	0.000201048	0.00688719	PC1	-0.637901	2.16677e-05	Distance_between_nuclear_gravity_center_and_cell_center
PC2	D131_C	-0.810001	0.000142668	0.00539446	PC1	-0.792724	4.97842e-09	Distance_between_nuclear_brightest_point_in_bud_and_middle_point_of_neck
PC2	D136_A1B	-0.815923	0.00011624	0.00452319	PC1	-0.7875	7.35706e-09	Distance_between_nuclear_brightest_point_and_mother_center
PC2	D117_C	-0.818209	0.000107196	0.00425389	PC1	-0.660733	8.55922e-06	Distance_between_nuclear_gravity_center_in_mother_and_mother_center
PC2	C103_A	-0.820028	0.000100426	0.00406574	PC1	-0.726443	3.58211e-07	Long_axis_length_in_whole_cell
PC2	D118_A1B	-0.836983	5.26974e-05	0.00248484	PC1	-0.837713	1.00851e-10	Distance_between_nuclear_gravity_center_and_mother_center
PC2	C11-2_C	-0.840229	4.61942e-05	0.00228576	PC1	-0.800411	2.74495e-09	Bud_cell_size
PC2	D119_C	-0.876436	8.45478e-06	0.000594505	PC1	-0.880379	6.91344e-13	Distance_between_nuclear_gravity_center_in_bud_and_bud_center
PC2	D102_A	-0.898662	2.24292e-06	0.000214038	PC1	-0.754721	6.81147e-08	Distance_between_nuclear_gravity_center_and_mother_tip
PC2	D127_A	-0.899206	2.1632e-06	0.000211466	PC1	-0.707604	9.71046e-07	Distance_between_nuclear_brightest_point_and_cell_tip
PC2	D137_C	-0.912281	8.47599e-07	0.000109586	PC1	-0.829283	2.27873e-10	Distance_between_nuclear_brightest_point_in_bud_and_bud_center
PC2	C12-2_C	-0.931038	1.65539e-07	2.65392e-05	PC1	-0.723146	4.2899e-07	Bud_cell_outline_length
PC2	D135_A	-0.936618	9.30892e-08	1.69592e-05	PC1	-0.577857	0.000180186	Distance_between_nuclear_brightest_point_and_cell_center
PC2	C107_C	-0.945937	3.13566e-08	8.21613e-06	PC1	-0.674387	4.7263e-06	Long_axis_length_in_bud
PC2	DCV112_C	-0.698233	0.00262764	0.046807	PC2	0.769663	2.5834e-08	Noise_of_ratio_of_D108_to_C128
PC2	D116_C	-0.700203	0.00252464	0.04558	PC2	-0.65949	9.02134e-06	Distance_between_two_nuclear_gravity_centers_through_middle_point_of_neck
PC2	DCV145_C	-0.721071	0.0016208	0.0331437	PC2	0.587401	0.0001323	Noise_of_distance_between_nuclear_outline_point_D7_in_mother_and_mother_hip
PC2	D134_C	-0.747063	0.000882013	0.0217579	PC2	-0.664557	7.26993e-06	Distance_between_two_nuclear_brightest_points_through_middle_point_of_neck
PC2	DCV108_C	-0.781181	0.000353104	0.0109709	PC2	0.62315	3.79767e-05	Noise_of_distance_between_nuclear_gravity_center_in_mother_and_middle_point_of_neck
PC2	DCV125_C	-0.832647	6.25597e-05	0.00288206	PC2	0.66307	7.74845e-06	Noise_of_distance_between_nuclear_gravity_center_in_mother_and_mother_hip
PC2	CCV117_C	-0.849864	3.07049e-05	0.00161928	PC2	0.746936	1.09905e-07	Noise_of_cell_outline_ratio
PC2	CCV118_C	-0.86263	1.70809e-05	0.00106969	PC2	0.78867	6.74753e-09	Noise_of_cell_size_ratio
PC2	A123_A1B	0.74364	0.000959392	0.0222268	PC3	-0.590597	0.000119039	Ratio_of_actin_patches_to_actin_region
PC3	A112	0.772161	0.000456475	0.0130881	PC1	0.612799	5.53658e-05	Actin_bcd_ratio
PC3	DCV113_C	0.752003	0.000779413	0.0195081	PC1	0.845038	4.77967e-11	Noise_of_ratio_of_D109_to_C107
PC3	DCV123_C	0.744505	0.000939345	0.0221464	PC1	0.823118	4.02375e-10	Noise_of_ratio_of_D121_to_C107
PC3	D182_A	-0.700363	0.00251639	0.04558	PC1	-0.586139	0.000137894	Nuclear_axis_ratio
PC3	CCV118_A1B	-0.69603	0.00274675	0.0484977	PC2	-0.547926	0.000447448	Noise_of_cell_size_ratio
PC3	DCV14-1_C	-0.746509	0.000894174	0.0217579	PC2	-0.687318	2.61585e-06	Noise_of_nuclear_size_in_mother
PC3	A118	-0.698949	0.00258981	0.0463391	PC3	0.787399	7.41236e-09	Actin_e_ratio_to_budded_cells
PC3	D182_A	-0.700363	0.00251639	0.04558	PC3	-0.522917	0.000898438	Nuclear_axis_ratio
PC3	DCV104_A1B	-0.701897	0.0024387	0.0444286	PC3	0.520811	0.00095045	Noise_of_distance_between_nuclear_gravity_center_and_mother_tip
PC3	CCV118_A1B	-0.69603	0.00274675	0.0484977	PC4	0.615007	5.11445e-05	Noise_of_cell_size_ratio
PC3	CCV116_C	-0.755211	0.000718184	0.0184518	PC4	-0.672984	5.03094e-06	Noise_of_axis_ratio_ratio
PC4	C115_A1B	-0.709045	0.00210183	0.0401149	PC1	-0.942749	2.88013e-18	Mother_axis_ratio
PC4	C115_A	-0.718363	0.00172039	0.0347751	PC1	-0.831552	1.83789e-10	Whole_cell_axis_ratio
PC4	DCV148_A1B	-0.731738	0.00127299	0.0276364	PC1	-0.600741	8.4501e-05	Noise_of_relative_distance_of_nuclear_brightest_point_to_mother_center
PC4	C115_C	-0.765257	0.000551443	0.0151609	PC1	-0.901683	2.66087e-14	Mother_axis_ratio
PC5	CCV114_A1B	0.706643	0.00221052	0.0415952	PC1	-0.807321	1.57184e-09	Noise_of_bud_axis_ratio
PC5	C120	-0.755574	0.000711522	0.0184518	PC1	-0.809893	1.26997e-09	Small_bud_ratio
PC5	ACV122_A	0.72514	0.00148001	0.031057	PC2	-0.934434	2.89166e-17	Noise_of_number_of_bright_actin_patches
PC6	D205	0.737615	0.00110908	0.024973	PC1	-0.736235	2.06439e-07	Nuclear_F_ratio
PC6	DCV155_A1B	-0.765122	0.000553457	0.0151609	PC1	-0.736235	2.06439e-07	Noise_of_angle_between_C1D2-1_and_C1C1-2
PC6	D205	0.737615	0.00110908	0.024973	PC2	0.676725	4.25602e-06	Nuclear_F_ratio
PC6	DCV155_A1B	-0.765122	0.000553457	0.0151609	PC2	-0.676725	4.25602e-06	Noise_of_angle_between_C1D2-1_and_C1C1-2
PC7	DCV163_C	0.730809	0.00130061	0.0280259	PC1	0.775392	1.74744e-08	Noise_of_angle_between_D2-1D2-2_and_C1C4-1
PC7	DCV172_A1B	-0.765567	0.000546855	0.0151609	PC1	-0.775392	1.74744e-08	Noise_of_angle_between_C4-1D4_and_C4-1C1
PC8	DCV17-3_A1B	0.753748	0.000745609	0.0189139	PC1	-0.732385	2.57113e-07	Noise_of_nuclear_fitness_for_ellipse
PC8	CCV115_A	0.695101	0.00279832	0.0491916	PC1	0.732385	2.57113e-07	Noise_of_whole_cell_axis_ratio
PC8	DCV17-3_A1B	0.753748	0.000745609	0.0189139	PC2	-0.68089	3.52304e-06	Noise_of_nuclear_fitness_for_ellipse
PC8	CCV115_A	0.695101	0.00279832	0.0491916	PC2	-0.68089	3.52304e-06	Noise_of_whole_cell_axis_ratio

## Sheet: Table S7
Table S7. Summary of cell morphological features correlated to each principal component.
1stPCA	Correlated cell morphology
PC1	Large nuclear size
PC1	Broad neck width
PC1	Long distance between mother nucleus and neck
PC1	Noise of size of actin region in bud
PC1	Long distance between nucleus in bud and bud tip
PC2	Small bud size
PC2	Low noise of cell size ratio
PC2	High ratio of actin patches to actin region
PC3	Actin bcd ratio
PC3	Low noise of nuclear size in mother
PC3	Low nuclear axis ratio
PC3	Low noise of axis ratio ratio
PC4	Low mother axis ratio
PC5	Low small bud ratio
PC5	High noise of number of bright actin patches
PC6	High nuclear F ratio
PC6	Low noise of angle between C1D2-1 and C1C1-2
PC7	Low noise of angle between C4-1D4 and C4-1C1
PC8	High noise of nuclear fitness for ellipse
PC8	High noise of whole cell axis ratio

## Sheet: Table S8
Table S8. Unexpected mutations introduced during genome editing.
Strain1	Chromsome	Physical position	Gene	Zygosity	Allele freq2	Changed amino acid residues3	Effect on protein structure	Holistic morphological abnormality7	Fitness defect7
K7GE417	XIV	166082	NRD1	Hetero	0.49:0.51	N*532K	None4	-	-
	X	522984	PTK2	Homo	0.00:1.00	Q162H*	None4	Not detected	Not detected
	X	551722	HOC1	Homo	0.00:1.00	N*345Y	None4	Significant	Not detected
	X	559745, 559945, 560156	ACF4	Homo	0.00:1.00	D*168N, N101S*, S31P*	None4	Significant	Not detected
	X	561607	CSN12	Homo	0.00:1.00	C*389F	None4	-	-
	X	570421	GRR1	Homo	0.00:1.00	H*204Y	None4	Significant	Significant
K6GE41	IV	724996, 726326, 726368	NUM1	Hetero	0.50:0.50	E688D, Q1132K, D1146N	None5	Not detected	Significant
	VII	177268	XRN1	Hetero	0.50:0.50	Q*191K	None5	Significant	Significant
	XV	91731	ZEO1	Hetero	0.50:0.50	A*52T	Ignored6	Not detected	Not detected
K9GE41	I	193471	FLO5	Hetero	0.50:0.50	I343F	None5	-	-
	IV	1320342	PFA5	Hetero	0.50:0.50	I*249T	None5	Significant	Not detected
	V	534807	CHD1	Hetero	0.50:0.50	T*1040I	Ignored6	Not detected	Not detected
	XII	258235	MEF1	Hetero	0.50:0.50	K*689T	None5	Not detected	Significant
K10GE41	XI	531887	NAP1	Hetero	0.50:0.50	L*166F	Moderate5	Significant	Not detected
	XV	559010, 559015	EFT1	Hetero	0.50:0.50	C*541F, Q*543E	Ignored6	Not detected	Not detected
	XVI	896854	SGE1	Hetero	0.50:0.50	Y*514Stop codon	Stop codon gained	Not detected	Not detected
1) Comparison with parental sequence (K7, K6, K9 or K10).
2) Parent sequence (K7, K6, K9 or K10) : Strain sequence
3) Amino acid residue in S288C is marked with asterisk.
4) Chadani et al., 2021
5) This study
6) Protein structure were not predicted due to lack of evidence supporting any morphological and/or fitness abnormalities.
7) Suzuki et al., 2017

## Sheet: Table S9
Table S9. Loadings of sake components after PCA. P-value >0.05 = N.S.
	PC1		PC2		PC3		PC4		PC5
	P-value	loadings	P-value	loadings	P-value	loadings	P-value	loadings	P-value	loadings
Urea	1.07e-13	0.96	N.S.	-0.05	N.S.	0.217	N.S.	0.057	N.S.	-0.03
DMTS-P1	3.79e-16	0.976	N.S.	-0.072	N.S.	0.102	N.S.	0.078	N.S.	-0.069
EtOCap	8.4e-11	-0.926	N.S.	0.256	N.S.	-0.216	N.S.	-0.093	N.S.	0.054
SMV	7.69e-14	0.962	N.S.	0.084	N.S.	0.026	N.S.	-0.121	N.S.	0.019
nPrOH	4.58e-06	0.789	N.S.	0.33	N.S.	-0.394	N.S.	0.101	N.S.	-0.227
Amino acid	0.00269	-0.585	N.S.	0.34	0.0429	0.417	N.S.	0.115	0.0197	-0.473
iBuOH	0.0161	0.486	0.00458	-0.558	N.S.	-0.173	N.S.	0.239	0.0225	-0.464

## Sheet: Table S10
Table S10. Detected parameters for which each step of breeding has a significant effect (Wald test, FDR = 0.05).
CalmMorph ID	K6 vs K6GE01	K6GE01 vs K6GE21	K6GE21 vs K6GE31	K6GE31 vs K6GE41	K7 vs K7GE01	K7GE01 vs K7GE21	K7GE21 vs K7GE31	K7GE31 vs K7GE41	K9 vs K9GE01	K9GE01 vs K9GE21	K9GE21 vs K9GE31	K9GE31 vs K9GE41	K10 vs K10GE01	K10GE01 vs K10GE21	K10GE21 vs K10GE31	K10GE31 vs K10GE41	Description
DCV17-1_A	0.761408	0.785397	0.620083	0.102016	0.127348	0.0183934	0.12564	0.000767541	0.689318	0.312257	0.212257	0.000331614	0.275354	0.104787	0.0283469	0.0018335	Noise_of_nuclear_fitness_for_ellipse
DCV182_A	0.409239	0.178224	0.248969	0.324877	0.533175	0.79632	0.451901	0.000484408	0.981095	0.505879	0.389842	0.000135229	0.355505	0.150921	0.120576	0.906168	Noise_of_nuclear_axis_ratio
C124_A1B	0.495213	0.320433	0.855663	0.0156776	0.346928	0.650048	0.834803	0.00122096	0.321134	0.932282	0.233954	0.265045	0.403185	0.469926	0.415481	0.545967	Medium_bud_ratio
C119	0.372969	0.841062	0.383052	0.271578	0.107488	0.384383	0.892875	2.81568e-06	0.185559	0.610997	0.60251	0.310571	0.0743201	0.00183354	0.0972406	0.0465106	No_bud_ratio
D210	0.370903	0.772169	0.399593	0.521423	0.15066	0.544767	0.892944	9.28697e-06	0.278775	0.518648	0.698321	0.316742	0.0435847	0.001448	0.0701214	0.143856	Nuclear_A_ratio_to_nuclear_AA1BC_cells
A106	0.495247	0.69494	0.449515	0.0432229	0.344452	0.60503	0.765492	1.32891e-09	0.594188	0.525903	0.656935	0.780904	0.0672117	0.00629217	0.135852	0.0538664	Actin_b_ratio
D199	0.54535	0.861118	0.376378	0.112313	0.214316	0.539759	0.964289	7.87206e-09	0.263072	0.417138	0.748392	0.379656	0.0273604	0.00278816	0.142242	0.00511164	Nuclear_A_ratio
CCV126_C	0.676943	0.881041	0.534631	0.988377	0.201409	0.423229	0.284813	0.185995	0.418092	0.985185	0.380976	0.159004	0.379959	0.325263	0.00303994	0.795106	Noise_of_brightness_difference_of_cell_wall
A108_A1B	0.924411	0.409595	0.827618	0.00283458	0.024118	0.219065	0.00853581	0.038701	0.369894	0.232379	0.526602	0.0836419	0.80849	0.689342	0.461029	0.53737	Actin_d_iso_ratio
A117	0.77621	0.640693	0.277881	0.000719908	0.0430228	0.35809	0.0292026	0.208873	0.27674	0.138287	0.565544	0.00114027	0.271549	0.788518	0.285118	0.177884	Actin_d_iso_ratio_to_budded_cells
CCV116_A1B	0.911711	0.294431	0.301474	0.34497	0.412809	0.137758	0.953576	0.387064	0.596676	0.39262	0.0811673	0.994235	0.387399	0.109331	0.974532	0.00127179	Noise_of_axis_ratio_ratio
C114_C	0.590636	0.939227	0.478742	1.42707e-06	0.0175657	0.00913701	0.00643902	0.00757543	0.451906	0.268371	0.403682	1.99451e-06	0.0468644	0.00291493	0.328821	1.39991e-06	Bud_axis_ratio
A8-1_A1B	0.535202	0.271317	0.0684269	2.0004e-16	0.0458902	0.0632968	0.16432	0.0270577	0.964428	0.574143	0.990291	0.0195632	0.150557	0.592012	0.8046	1.13297e-09	Total_brightness_of_actin_region_in_mother
A101_A1B	0.422473	0.670793	0.193087	8.60458e-11	0.560991	0.1802	0.078009	0.926408	0.986554	0.313474	0.525485	0.209743	0.102259	0.23626	0.900541	2.22085e-05	Actin_region_ratio_in_whole_cell
DCV155_A1B	0.8755	0.636911	0.972745	0.281514	0.786557	0.730063	0.80717	0.864515	0.00110867	0.0698938	0.590215	0.594482	0.0613686	0.642823	0.0446405	0.00472883	Noise_of_angle_between_C1D2-1_and_C1C1-2
C125_A1B	0.935998	0.663292	0.549142	0.1106	0.0543808	0.520589	0.0565085	0.919524	0.34979	0.241586	0.208516	0.362658	0.225574	0.874611	0.156188	0.00145019	Large_bud_ratio
C117_A1B	0.766366	0.940696	0.605391	0.0128577	0.336876	0.475984	0.397757	0.0311108	0.299809	0.736059	0.918759	0.568375	0.402619	0.751149	0.801074	0.00190087	Cell_outline_ratio
C118_A1B	0.725054	0.946339	0.613798	0.0203192	0.366284	0.568907	0.398614	0.101932	0.270114	0.642068	0.903875	0.460613	0.506885	0.857714	0.683764	0.00131739	Cell_size_ratio
A101_C	0.137413	0.292834	0.615137	4.48139e-05	0.325863	0.252625	0.743267	0.0347748	0.23656	0.814621	0.579476	0.404602	0.0289522	0.688639	0.653414	0.302835	Actin_region_ratio_in_whole_cell
A9_A1B	0.528537	0.876405	0.4379	1.12027e-24	0.962017	0.189432	0.452249	1.07735e-07	0.401731	0.125629	0.558051	0.0771326	0.258943	0.41137	0.424499	2.58817e-10	Proportion_of_actin_region_at_neck
A9_C	0.710252	0.776262	0.990209	2.87772e-12	0.083094	0.836927	0.744183	6.43303e-13	0.402401	0.192242	0.955603	0.108228	0.191842	0.62976	0.493066	0.10187	Proportion_of_actin_region_at_neck
ACV101_C	0.723386	0.660258	0.930993	0.114544	0.352443	0.235944	0.610866	0.030683	0.0552369	0.0711523	0.687273	0.110425	0.0953121	0.703933	0.51732	0.000987606	Noise_of_actin_region_ratio_in_whole_cell
C13_A1B	0.514754	0.428329	0.796184	0.75449	0.0065439	0.602123	0.940437	8.94587e-07	0.359562	0.0394532	0.494317	0.554152	0.0651599	0.502479	0.108399	7.63833e-06	Mother_cell_fitness_for_ellipse
C13_C	0.48555	0.544726	0.801727	0.770246	0.0168433	0.996716	0.974331	3.21053e-08	0.223011	0.439471	0.856437	0.438019	0.0641772	0.197784	0.7675	0.00014033	Mother_cell_fitness_for_ellipse
D183_C	0.582618	0.624038	0.800404	0.187681	0.262039	0.374572	0.37276	0.00085036	0.994049	0.463763	0.548682	0.00408501	0.200198	0.35467	0.303314	2.09577e-05	Nuclear_axis_ratio_in_bud
D206	0.175054	0.940822	0.943466	0.0250758	0.236288	0.326244	0.818636	4.33391e-09	0.313654	0.34764	0.672747	2.32293e-05	0.0200306	0.797165	0.579837	0.000729111	Nuclear_A_ratio_to_no_bud_cells
D143_C	0.322142	0.874148	0.876633	2.26869e-08	0.720859	0.504255	0.8094	3.83844e-05	0.61539	0.897492	0.316712	5.55932e-09	0.0861065	0.168336	0.487817	8.06067e-09	Distance_between_nuclear_outline_point_D6-1_in_mother_and_middle_point_of_neck
D112_C	0.63486	0.870584	0.787209	1.53275e-08	0.336819	0.4792	0.909817	1.84482e-11	0.716665	0.690655	0.597045	3.74184e-08	0.574649	0.19376	0.135481	1.18636e-12	Ratio_of_D108_to_C128
D152_C	0.518388	0.895869	0.68485	8.65897e-13	0.272114	0.392656	0.749322	9.87533e-14	0.331352	0.796116	0.321981	1.50992e-08	0.0793603	0.0624445	0.0890656	2.82451e-14	Mobility_of_nucleus_in_mother
C114_A1B	0.359163	0.874676	0.728874	5.23277e-10	0.774719	0.226744	0.0435331	4.12676e-11	0.878394	0.108011	0.25315	3.94381e-11	0.214522	0.124978	0.365534	6.29247e-09	Bud_axis_ratio
A110_A1B	0.306594	0.115678	0.95302	0.0068704	0.332637	0.888056	0.421657	0.000369484	0.832548	0.329356	0.525368	0.00042756	0.407292	0.783109	0.387635	1.94288e-06	Actin_f_ratio
C125_C	0.414547	0.499662	0.593119	0.00826307	0.270854	0.290521	0.833287	5.45555e-06	0.716809	0.909399	0.699865	0.0119913	0.552469	0.785777	0.212091	9.2778e-05	Large_bud_ratio
C117_C	0.375211	0.441329	0.684963	8.42861e-11	0.0234086	0.130114	0.910859	2.46335e-15	0.840222	0.843817	0.168103	0.000369396	0.682223	0.868681	0.125502	4.12332e-11	Cell_outline_ratio
C118_C	0.414365	0.434734	0.69495	4.38225e-11	0.0592536	0.125235	0.869251	4.04417e-14	0.905037	0.830031	0.143165	0.000573061	0.762824	0.886804	0.137044	1.93818e-11	Cell_size_ratio
C116_A1B	0.63014	0.865176	0.781164	0.000125945	0.0973364	0.836694	0.482247	3.21806e-13	0.111914	0.255172	0.117465	0.00129126	0.738099	0.340267	0.778204	1.32167e-05	Axis_ratio_ratio
C116_C	0.961861	0.747189	0.851393	0.0888514	0.953294	0.892495	0.806339	6.78347e-10	0.222414	0.642863	0.986632	0.315497	0.481695	0.72562	0.865683	0.000382974	Axis_ratio_ratio
D182_C	0.309628	0.151839	0.178928	0.606239	0.366756	0.941097	0.534	0.0037277	0.716289	0.830453	0.591444	0.195134	0.473758	0.620457	0.964211	0.391725	Nuclear_axis_ratio_in_mother
D214	0.0446856	0.78539	0.44577	0.129088	0.208	0.292242	0.973199	1.99342e-05	0.661294	0.120959	0.302264	0.0660178	0.371455	0.164889	0.587455	0.766765	Nuclear_A1_ratio_to_nuclear_A1BC_cells
D200	0.0123416	0.786724	0.613472	0.000529843	0.0452861	0.549117	0.664476	2.08478e-11	0.902288	0.243421	0.624809	2.94192e-05	0.296269	0.722131	0.37022	0.00369838	Nuclear_A1_ratio
D207	0.0439101	0.947237	0.497435	0.000851426	0.205055	0.359878	0.651846	2.05991e-12	0.609585	0.339558	0.414975	0.000242555	0.846506	0.32719	0.933828	0.00126944	Nuclear_A1_ratio_to_budded_cells
C126_A	0.0927586	0.78188	0.630628	0.191182	0.00173445	0.437317	0.778478	0.587659	0.6012	0.801624	0.950878	0.589216	0.229422	0.870484	0.813062	0.534005	Brightness_difference_of_cell_wall
C126_A1B	0.0431063	0.687161	0.75927	0.0441434	0.00149938	0.275127	0.150667	0.027611	0.797869	0.838122	0.656766	0.455136	0.635117	0.482694	0.626356	0.76534	Brightness_difference_of_cell_wall
A112	0.122862	0.241739	0.790202	0.149674	0.00938898	0.742018	0.597773	0.000166775	0.862723	0.368936	0.47682	0.316439	0.169922	0.98678	0.668603	0.0114956	Actin_bcd_ratio
A106_A	0.547239	0.515554	0.51977	0.0012777	0.018205	0.275586	0.135806	1.05472e-05	0.148789	0.744837	0.686996	0.259014	0.847256	0.246639	0.686818	0.908845	Actin_b_ratio
A115	0.311401	0.409935	0.653456	0.00226104	0.0251794	0.265429	0.23651	1.42717e-09	0.0727172	0.709442	0.988353	0.194862	0.720697	0.601318	0.969196	0.830964	Actin_b_ratio_to_no_bud_cells
D169_A1B	0.814652	0.372001	0.199895	0.845356	0.041512	0.7619	0.931238	0.000541744	0.986064	0.000365232	0.941509	2.88011e-07	0.276481	0.601009	0.354783	0.0157137	Angle_between_C4-1D1-1_and_C4-1C1
A109_C	0.896507	0.165393	0.338502	0.802253	0.353163	0.58954	0.32195	0.176314	0.881609	0.269704	0.322487	0.00138625	0.356736	0.660862	0.862431	0.00219749	Actin_e_ratio
ACV103_A1B	0.495603	0.0332458	0.12442	0.0890049	0.118236	0.2806	0.350085	0.000391133	0.106103	0.288873	0.752247	0.211496	0.302767	0.575355	0.0786818	0.000993614	Noise_of_relative_distance_of_actin_patch_center_from_neck_in_mother
D154_C	0.78539	0.818098	0.778561	0.660151	0.40597	0.529432	0.65466	7.72913e-08	0.311965	0.288086	0.902538	0.0146919	0.937989	0.619768	0.689034	0.00620778	Angle_between_C1D1-1_and_C1C1-2
D155_C	0.796462	0.664004	0.72791	0.826529	0.821583	0.534228	0.817925	0.000390504	0.643636	0.888468	0.616084	0.0298368	0.989258	0.366231	0.814369	0.0166005	Angle_between_C1D2-1_and_C1C1-2
D154_A	0.964981	0.215691	0.0458897	0.585477	0.464602	0.613777	0.417795	6.14347e-07	0.444265	0.923787	0.699647	0.588823	0.583013	0.839507	0.676547	0.000486093	Angle_between_C1D1-1_and_C1C1-2
D155_A	0.595033	0.698698	0.0955762	0.32843	0.967102	0.508281	0.0748065	4.73073e-11	0.487447	0.858454	0.512746	0.469793	0.530914	0.622601	0.463391	0.00111101	Angle_between_C1D2-1_and_C1C1-2
D154_A1B	0.90505	0.415542	0.629085	0.469425	0.259473	0.00179408	0.0149091	0.017915	0.165555	0.552146	0.0160074	0.776088	0.599165	0.0399078	0.0723374	0.000342782	Angle_between_C1D1-1_and_C1C1-2
D155_A1B	0.868585	0.848054	0.710946	0.0793431	0.676019	0.00150577	0.0441726	0.0643265	0.0937826	0.559311	0.0266798	0.610811	0.65892	0.0324497	0.117111	0.00931099	Angle_between_C1D2-1_and_C1C1-2
C105_A1B	0.924746	0.76499	0.620124	0.532005	0.666711	0.00121444	0.0284805	0.0189926	0.96547	0.892754	0.256089	0.364697	0.874179	0.378658	0.117137	0.0299555	Neck_position
C106_A1B	0.970982	0.64823	0.513537	0.32593	0.468437	0.00267434	0.0679853	0.0617239	0.652481	0.972231	0.341143	0.992827	0.836419	0.660506	0.141979	0.0033657	Bud_direction
CCV117_A1B	0.968214	0.872577	0.962418	0.496834	0.0118659	0.0808109	0.567872	0.697023	0.713257	0.803863	0.56512	0.0045921	0.510838	0.612791	0.304457	0.00396739	Noise_of_cell_outline_ratio
DCV107_A1B	0.634023	0.522891	0.479937	0.498084	0.437783	0.0264113	0.031397	0.264073	0.417998	0.138271	0.282326	0.40824	0.637371	0.0987752	0.00422324	0.000244423	Noise_of_ratio_of_D104_to_C103
A113_C	0.900965	2.03708e-34	0.651899	0.352827	0.212374	0.875811	0.840978	0.238047	0.80935	0.646115	0.835781	3.24453e-30	0.392556	0.972993	0.996036	0.905077	Actin_n_ratio
D148_A	0.517842	0.230831	0.948969	0.000411665	0.71357	0.898267	0.700498	0.55553	0.985122	0.00520943	0.207699	0.000545293	0.0451725	0.124099	0.0425597	0.0152881	Relative_distance_of_nuclear_brightest_point_to_cell_center
D117_A	0.300484	0.372151	0.158708	0.00210896	0.441409	0.694854	0.243183	0.0954817	0.913869	0.0512406	0.870931	0.000664078	0.0094973	0.0775269	0.0796779	0.683663	Distance_between_nuclear_gravity_center_and_cell_center
D147_A	0.271599	0.245597	0.0366913	0.0151777	0.476765	0.413633	0.123218	0.100584	0.936736	0.0115683	0.785031	4.31279e-06	0.0177273	0.117053	0.0327386	0.00757305	Relative_distance_of_nuclear_gravity_center_to_cell_center
D147_A1B	0.265613	0.317273	0.143081	0.000911804	0.741489	0.352508	0.0586169	0.21865	0.757892	0.0782543	0.866627	5.52673e-05	0.0597533	0.466746	0.159141	0.831929	Relative_distance_of_nuclear_gravity_center_to_mother_center
D113_C	0.0810963	0.055472	0.235815	1.19494e-05	0.96806	0.561386	0.288104	1.50074e-06	0.314864	0.790641	0.0939082	0.00610828	0.000384332	0.0708062	0.299299	3.72763e-07	Ratio_of_D109_to_C107
D153_C	0.0675264	0.0579491	0.0746565	9.63539e-09	0.960247	0.899513	0.461469	7.24895e-06	0.474116	0.816287	0.137131	0.0986464	0.00149227	0.0467709	0.490551	4.64147e-05	Mobility_of_nucleus_in_bud
D116_C	0.49142	0.868255	0.614718	3.08711e-10	0.975848	0.199254	0.658961	0.0295237	0.919774	0.689563	0.448749	2.84585e-07	0.0158079	0.0659626	0.205789	8.54719e-08	Distance_between_two_nuclear_gravity_centers_through_middle_point_of_neck
D134_C	0.516376	0.773143	0.42684	3.21131e-11	0.871253	0.237286	0.826712	0.171457	0.950143	0.609861	0.580469	2.11281e-07	0.0167514	0.063905	0.166276	7.32294e-08	Distance_between_two_nuclear_brightest_points_through_middle_point_of_neck
D108_C	0.737698	0.737638	0.993802	1.36352e-07	0.659532	0.377994	0.942728	0.0103923	0.757459	0.480691	0.648894	6.38151e-08	0.210456	0.142674	0.314102	8.4507e-08	Distance_between_nuclear_gravity_center_in_mother_and_middle_point_of_neck
D130_C	0.66786	0.931316	0.655175	3.15786e-08	0.374829	0.284896	0.726475	0.0541852	0.686888	0.419322	0.815727	3.23314e-07	0.216364	0.16125	0.221397	9.05719e-08	Distance_between_nuclear_brightest_point_in_mother_and_middle_point_of_neck
D144_C	0.299372	0.195238	0.165306	3.6111e-09	0.633535	0.434505	0.507766	0.0600588	0.204375	0.224965	0.186708	0.00295508	0.000737556	0.0551621	0.539124	0.000426175	Distance_between_nuclear_outline_point_D6-2_in_bud_and_middle_point_of_neck
D109_C	0.330484	0.40886	0.336585	1.26197e-08	0.627496	0.208638	0.364217	0.187715	0.87736	0.964905	0.387136	0.00099362	0.00218591	0.107986	0.267117	8.62625e-05	Distance_between_nuclear_gravity_center_in_bud_and_middle_point_of_neck
D131_C	0.473462	0.513597	0.35947	2.34467e-09	0.40511	0.416648	0.436074	0.726868	0.708487	0.945222	0.422446	0.000220966	0.00210877	0.0845209	0.297827	0.000145237	Distance_between_nuclear_brightest_point_in_bud_and_middle_point_of_neck
DCV103_C	0.417372	0.554735	0.921079	0.0310122	0.703029	0.284933	0.233724	0.505955	0.366945	0.269458	0.851894	0.000565208	0.0175044	0.173961	0.993122	0.155072	Noise_of_distance_between_nuclear_gravity_center_in_mother_and_mother_tip
DCV125_C	0.323771	0.271406	0.671942	0.00268219	0.817885	0.501856	0.382939	0.385189	0.350791	0.666308	0.629009	0.0306039	0.00569567	0.0289927	0.446351	0.487429	Noise_of_distance_between_nuclear_gravity_center_in_mother_and_mother_hip
D148_C	0.885747	0.0280566	0.0817677	0.000626667	0.316733	0.96934	0.114428	0.149231	0.992065	0.123416	0.469896	0.0161203	0.0328964	0.0313908	0.822227	0.523377	Relative_distance_of_nuclear_brightest_point_in_mother_to_mother_center
DCV112_C	0.29868	0.192081	0.314691	0.00218479	0.849898	0.620529	0.140551	0.60377	0.268255	0.716863	0.764755	0.0429414	0.0494799	0.0748577	0.898713	0.242956	Noise_of_ratio_of_D108_to_C128
D148_A1B	0.256214	0.707793	0.759269	5.17396e-08	0.385928	0.122168	0.635174	0.659557	0.980233	0.242108	0.451811	1.72067e-05	0.0250849	0.241453	0.664684	0.110913	Relative_distance_of_nuclear_brightest_point_to_mother_center
D147_C	0.331983	0.408393	0.693129	0.00100646	0.552211	0.602875	0.802514	0.822801	0.634081	0.0175817	0.966573	0.000178438	0.0357978	0.0176667	0.610794	0.673672	Relative_distance_of_nuclear_gravity_center_in_mother_to_mother_center
D119_C	0.0379425	0.548327	0.446959	1.53171e-08	0.983755	0.295099	0.439158	0.520699	0.613806	0.448588	0.948528	0.00420348	0.0142029	0.0942467	0.386048	0.078789	Distance_between_nuclear_gravity_center_in_bud_and_bud_center
D137_C	0.142244	0.541876	0.388241	1.32613e-06	0.669265	0.196178	0.0493874	0.0420245	0.619983	0.390727	0.959222	0.190727	0.00756836	0.0409227	0.507775	0.492984	Distance_between_nuclear_brightest_point_in_bud_and_bud_center
D149_C	0.0126582	0.299057	0.378669	7.87208e-07	0.978273	0.996828	0.856796	0.0741233	0.4168	0.280954	0.985501	0.0226122	0.0399633	0.186412	0.679396	0.0610714	Relative_distance_of_nuclear_gravity_center_in_bud_to_bud_center
D150_C	0.0638861	0.344095	0.307158	2.21349e-05	0.581258	0.868281	0.106987	0.454329	0.525288	0.290479	0.979542	0.535615	0.0330991	0.116157	0.911142	0.791893	Relative_distance_of_nuclear_brightest_point_in_bud_to_bud_center
C123_A1B	0.659171	0.581366	0.622694	0.00244673	0.608166	0.479313	0.316767	0.00582388	0.178988	0.555039	0.86436	0.758148	0.117352	0.5824	0.808838	0.00963759	Small_bud_ratio
A107_A1B	0.938995	0.559541	0.57435	0.00149858	0.776089	0.27845	0.135713	0.0164697	0.0905196	0.31601	0.444428	0.458081	0.00460847	0.403029	0.799336	0.00235711	Actin_c_api_ratio
A107	0.18154	0.782879	0.290996	0.00951505	0.0862538	0.63015	0.429449	0.448983	0.403203	0.732773	0.277715	0.188892	0.000215267	0.0881641	0.642153	0.00916128	Actin_c_api_ratio
A116	0.289073	0.65229	0.213082	0.0333875	0.275704	0.856821	0.448141	0.29586	0.139914	0.935609	0.177773	0.350768	0.00262861	0.653889	0.812689	0.0573681	Actin_c_api_ratio_to_budded_cells
A102_A1B	0.666183	0.696659	0.865177	1.1225e-06	0.285903	0.776638	0.94701	0.634168	0.494742	0.197866	0.502033	0.000127397	0.426955	0.381545	0.747979	2.57112e-09	Bud_actin_region_ratio_to_total_region
A123_A1B	0.436189	0.730109	0.76062	0.000268692	0.931159	0.827367	0.984194	0.318107	0.712114	0.138536	0.154332	0.129562	0.283906	0.585235	0.495113	0.127163	Ratio_of_actin_patches_to_actin_region
DCV17-1_C	0.953245	0.108987	0.0753727	0.0035462	0.224781	0.205947	0.712439	0.167117	0.283383	0.322165	0.816237	0.000375725	0.221426	0.23493	0.873315	0.114733	Noise_of_nuclear_fitness_for_ellipse_in_mother
C115_A	0.308143	0.855631	0.182869	2.37558e-05	0.0184028	0.0136796	0.0737576	0.167751	0.249809	0.140215	0.85935	3.16333e-05	0.340003	0.030545	0.206745	0.141748	Whole_cell_axis_ratio
C115_A1B	0.508754	0.973375	0.425263	4.19942e-05	0.0275853	0.112762	0.0870212	0.337737	0.0505184	0.443222	0.734993	5.60351e-07	0.0488976	0.00202608	0.218804	0.0213192	Mother_axis_ratio
C115_C	0.560044	0.859764	0.498778	6.17126e-06	0.0249092	0.0215066	0.0350661	0.0712949	0.155511	0.502935	0.4668	5.09839e-05	0.0176796	0.00219185	0.334415	0.0114543	Mother_axis_ratio
ACV7-1_A	0.326079	0.325121	0.100822	0.000481648	0.82545	0.871221	0.882819	0.0583335	0.573136	0.796429	0.9192	0.639343	0.568977	0.569148	0.601617	0.22407	Noise_of_size_of_actin_region
ACV8-1_A	0.257297	0.172666	0.179489	0.00347868	0.0543354	0.471466	0.843054	0.00166917	0.662973	0.977096	0.934816	0.787824	0.698557	0.781416	0.789933	0.270539	Noise_of_actin_region_brightness
DCV155_A	0.0594491	0.144472	0.00152075	0.0351285	0.985427	0.6482	0.696526	0.000323494	0.462458	0.427948	0.614965	0.443274	0.3785	0.678415	0.507795	0.0363483	Noise_of_angle_between_C1D2-1_and_C1C1-2
CCV108_A1B	0.471864	0.380573	0.0446138	0.000868559	0.139049	0.81479	0.0498071	0.0480927	0.496997	0.91027	0.494314	0.307574	0.564004	0.922777	0.823055	0.30112	Noise_of_short_axis_length_in_bud
A110_C	0.290121	0.21502	0.939877	0.174281	0.0785744	0.714896	0.891928	0.116287	0.116799	0.00118211	0.127359	0.42953	0.796203	0.759702	0.770459	0.993741	Actin_f_ratio
DCV182_C	0.483123	0.335576	0.972964	0.828259	0.915327	0.271147	0.482492	0.71533	0.076984	0.000453868	0.203056	0.420159	0.770064	0.941225	0.342729	0.391068	Noise_of_nuclear_axis_ratio_in_mother
D114_A1B	0.422594	0.765661	0.798246	0.00228548	0.427823	0.376949	0.0477919	0.349966	0.844014	0.910876	0.718257	0.0663829	0.169495	0.315543	0.162237	0.0715663	Ratio_of_D110_to_C128
CCV101_A1B	0.21029	0.993491	0.543113	9.48921e-08	0.208323	0.140361	0.324859	0.162439	0.673222	0.835662	0.825738	0.766687	0.241508	0.657291	0.514689	0.842987	Noise_of_whole_cell_size
DCV135_C	0.768784	0.645158	0.195384	1.69584e-05	0.699161	0.0299606	0.0844836	0.358944	0.404619	0.0385954	0.511666	0.000381907	0.261084	0.428051	0.667486	0.299222	Noise_of_distance_between_nuclear_brightest_point_in_mother_and_mother_center
DCV148_C	0.972097	0.936293	0.398564	0.000111528	0.688338	0.0804149	0.218114	0.0284674	0.432052	0.431449	0.366618	3.01775e-05	0.521188	0.974025	0.999868	0.156845	Noise_of_relative_distance_of_nuclear_brightest_point_in_mother_to_mother_center
CCV116_C	0.891558	0.79528	0.900039	0.182415	0.784647	0.909105	0.670608	0.0457655	0.533886	0.33724	0.884425	0.878578	0.168157	0.978923	0.0838043	0.000710665	Noise_of_axis_ratio_ratio
DCV14-3_C	0.0772511	0.693152	0.742395	0.442065	0.121974	0.284643	0.925312	0.00232328	0.386298	0.829418	0.612813	0.852831	0.160357	0.460623	0.789704	0.0796622	Noise_of_nuclear_size_in_whole_cell
A7-1_C	0.46483	0.470206	0.915408	0.0133306	0.731049	0.696663	0.985822	0.000159086	0.389678	0.788148	0.611464	1.02192e-05	0.39984	0.106496	0.129373	0.00404427	Size_of_actin_region_in_mother
A7-1_A1B	0.298699	0.314291	0.0975353	2.4472e-16	0.0176481	0.146727	0.352165	1.22336e-19	0.671211	0.345512	0.32785	0.000234624	0.547804	0.423181	0.716894	5.9878e-09	Size_of_actin_region_in_mother
A8-1_C	0.756767	0.835374	0.319558	0.00356492	0.986691	0.512541	0.287377	0.0134083	0.321649	0.277635	0.32375	0.182929	0.539199	0.3666	0.306076	0.00765607	Total_brightness_of_actin_region_in_mother
CCV111_C	0.720117	0.312545	0.732131	0.000705391	0.531495	0.147946	0.423674	0.00568202	0.558614	0.694406	0.377528	0.926301	0.442138	0.952294	0.0455417	0.192641	Noise_of_distance_between_bud_tip_and_mother_short_axis_extension
ACV120_A	0.62253	0.0966226	0.318684	0.121342	0.0217014	0.676725	0.15668	9.1424e-05	0.722932	0.32506	0.970664	0.94196	0.417561	0.529765	0.136403	0.178745	Noise_of_total_length_of_actin_patch_link
ACV121_A	0.732233	0.198633	0.290375	0.0998034	0.0304581	0.992908	0.16867	3.51757e-05	0.893556	0.482741	0.921208	0.439885	0.274367	0.316918	0.0499074	0.291597	Noise_of_maximal_distance_between_patches
A113_A1B	0.0456912	0.963264	0.965089	0.879689	0.000300042	0.161702	0.0786894	0.0241679	0.767256	0.361529	0.993656	0.963929	6.41639e-05	0.94475	0.0241455	0.964162	Actin_n_ratio
A101_A	0.681072	0.9376	0.690534	0.00118341	0.026165	0.103138	0.0946522	0.0360697	0.0988647	0.63836	0.650612	0.000576209	0.775457	0.442754	0.86463	0.632347	Actin_region_ratio_in_whole_cell
A105_A	0.722809	0.510355	0.426153	0.000344451	0.027006	0.105683	0.0705647	0.011277	0.0925814	0.741817	0.515994	0.263413	0.673463	0.252591	0.672461	0.866799	Actin_a_ratio
A114	0.494713	0.497301	0.474518	0.000542689	0.0296946	0.124644	0.11271	3.16795e-07	0.0641871	0.664505	0.878669	0.20476	0.631743	0.672501	0.83716	0.778576	Actin_a_ratio_to_no_bud_cells
CCV104_A1B	0.360848	0.733868	0.617028	0.000471388	0.44678	0.691281	0.739716	0.102789	0.599082	0.208255	0.137997	0.0517144	0.268649	0.715591	0.260348	0.125352	Noise_of_short_axis_length_in_mother
CCV109_C	0.0764132	0.828834	0.547639	0.000116947	0.586442	0.547015	0.147275	0.318547	0.464531	0.368174	0.84792	0.174286	0.0327277	0.216009	0.926051	0.0402011	Noise_of_neck_width
CCV103_A1B	0.300951	0.461226	0.854788	5.64977e-10	0.0920898	0.479047	0.354576	0.00349333	0.937971	0.79611	0.996683	0.0561194	0.11079	0.0592917	0.897972	0.079587	Noise_of_long_axis_length_in_mother
CCV11-1_A1B	0.320432	0.75301	0.971235	4.45371e-08	0.739422	0.651188	0.455301	0.0204567	0.592895	0.371217	0.551906	0.822094	0.536547	0.525654	0.799951	0.652327	Noise_of_mother_cell_size
CCV12-1_A1B	0.406247	0.52217	0.784971	2.05431e-07	0.753247	0.37638	0.675729	0.0106513	0.759035	0.589516	0.746843	0.46989	0.48437	0.23237	0.899596	0.334739	Noise_of_mother_cell_outline_length
CCV128_A1B	0.122352	0.613838	0.559206	3.40371e-05	0.981325	0.0393798	0.831553	0.00026535	0.232381	0.404667	0.634083	0.423848	0.0753676	0.0799671	0.609156	0.853223	Noise_of_distance_between_middle_point_of_neck_and_mother_hip
CCV128_C	0.295092	0.52701	0.991323	7.62151e-07	0.844632	0.240449	0.668202	0.00420548	0.753579	0.987619	0.207986	0.886984	0.276368	0.353092	0.658909	0.205078	Noise_of_distance_between_middle_point_of_neck_and_mother_hip
CCV103_C	0.213127	0.809674	0.491253	5.01605e-08	0.0621397	0.246273	0.85588	0.0814496	0.475454	0.81578	0.532592	0.850947	0.085315	0.0155978	0.122104	0.832385	Noise_of_long_axis_length_in_mother
CCV112_C	0.0848176	0.169333	0.899952	2.90038e-08	0.656147	0.362972	0.764663	0.0163778	0.821404	0.928035	0.0502433	0.141368	0.0595672	0.0129698	0.121979	0.0987066	Noise_of_distance_between_middle_point_of_neck_and_mother_center
CCV11-1_C	0.311703	0.920344	0.786749	0.000139719	0.464419	0.520017	0.961345	0.223503	0.6198	0.363498	0.140341	0.0848251	0.0571336	0.193164	0.28065	0.910885	Noise_of_mother_cell_size
CCV12-1_C	0.290835	0.867426	0.883707	4.05167e-06	0.700901	0.607872	0.919281	0.135234	0.597591	0.479238	0.08332	0.168734	0.204271	0.127773	0.0799388	0.538337	Noise_of_mother_cell_outline_length
DCV145_A1B	0.188902	0.0341227	0.147006	0.934208	0.785895	0.239315	0.289624	0.000483425	0.484491	0.441962	0.910326	0.524502	0.279883	0.758934	0.48038	0.807393	Noise_of_distance_between_nuclear_outline_point_D7_and_mother_hip
DCV194_C	0.409777	0.135055	0.128488	0.688415	0.996927	0.150953	0.95884	0.000547799	0.496782	0.468127	0.409435	0.774056	0.205101	0.160217	0.716067	0.301393	Noise_of_maximal_intensity_of_nuclear_brightness_divided_by_average_in_mother
DCV181_A1B	0.632191	0.0904416	0.863355	0.458012	0.973084	0.685988	0.905104	0.000975068	0.541728	0.749057	0.441247	0.785564	0.978836	0.627413	0.715647	0.866478	Noise_of_nuclear_minimum_radius
A120_A1B	0.404427	0.38732	0.0652433	0.903732	0.695117	0.876624	0.996026	0.000401006	0.203594	0.325238	0.753204	0.855236	0.53528	0.557073	0.394694	0.958195	Total_length_of_actin_patch_link
A121_A1B	0.28701	0.344245	0.0495919	0.863105	0.769979	0.751799	0.860858	0.000131364	0.1626	0.436017	0.849579	0.524694	0.331166	0.719378	0.376404	0.791764	Maximal_distance_between_patches
DCV117_C	0.145171	0.275652	0.812022	0.0723415	0.357511	0.00860381	0.070912	1.70787e-07	0.403381	0.96007	0.0377028	0.000136814	0.999815	0.732589	0.703526	0.590655	Noise_of_distance_between_nuclear_gravity_center_in_mother_and_mother_center
DCV147_C	0.0709572	0.431129	0.779917	0.524765	0.635897	0.0169092	0.0179775	5.44177e-06	0.95656	0.5126	0.0461011	0.00317186	0.17582	0.293248	0.965256	0.117987	Noise_of_relative_distance_of_nuclear_gravity_center_in_mother_to_mother_center
ACV7-2_A1B	0.864847	0.733734	0.877068	0.149967	0.369561	0.130741	0.593042	0.000810901	0.393249	0.716174	0.818342	0.412336	0.343809	0.879965	0.908233	0.311187	Noise_of_size_of_actin_region_in_bud
ACV102_A1B	0.906621	0.460151	0.30276	0.677263	0.723548	0.059401	0.232852	3.19437e-05	0.484831	0.0813862	0.660635	0.416941	0.962655	0.364356	0.126447	0.491989	Noise_of_bud_actin_region_ratio_to_total_region
D179_A	0.180533	0.0717933	0.139688	0.46735	0.595476	0.35712	0.00620811	1.5558e-05	0.960616	0.503266	0.861567	0.327888	0.123771	0.269595	0.708428	0.0660876	Nuclear_minimum_radius
D14-1_A	0.0527091	0.119503	0.0717722	0.169562	0.55855	0.708017	0.0159169	2.11948e-05	0.973865	0.690972	0.759587	0.120877	0.264843	0.495911	0.349787	0.0321097	Nuclear_size
D173_A	0.0913058	0.12949	0.205066	0.251207	0.35279	0.897017	0.0236556	0.000835558	0.953547	0.403058	0.608794	0.211135	0.35695	0.750543	0.179374	0.00896128	Maximal_distance_between_nuclear_gravity_center_and_nuclear_outline
D176_A	0.0894178	0.118098	0.189744	0.245593	0.402703	0.862666	0.0218676	0.00142648	0.991047	0.420289	0.599771	0.178329	0.314455	0.658173	0.216604	0.0113566	Nuclear_long_axis_length
D17-3_A1B	0.398255	0.113518	0.103775	0.34161	0.721031	0.91986	0.660786	0.000811748	0.90163	0.788002	0.960431	0.518402	0.953882	0.430746	0.891361	0.271971	Nuclear_fitness_for_ellipse
D188_C	0.747327	0.0798926	0.100616	0.136942	0.54937	0.545363	0.0762472	0.00172136	0.951359	0.477367	0.597167	0.0178236	0.886935	0.695225	0.926163	0.0695342	Distance_between_nuclear_gravity_center_and_brightest_point_in_mother
D181_A1B	0.493861	0.203146	0.344446	0.0824485	0.319296	0.491171	0.0518171	8.0957e-07	0.431147	0.797241	0.606804	0.0591322	0.407762	0.346823	0.724057	0.00463463	Nuclear_minimum_radius
D14-3_A1B	0.391886	0.122798	0.130598	0.201215	0.54686	0.510822	0.0510637	1.04289e-07	0.474641	0.916401	0.71801	0.0601815	0.608501	0.331692	0.793161	0.0176308	Nuclear_size
D175_A1B	0.358158	0.118683	0.1184	0.222103	0.614231	0.651307	0.121943	8.56689e-06	0.592883	0.899869	0.70208	0.115736	0.610507	0.266168	0.846308	0.0298381	Maximal_distance_between_nuclear_gravity_center_and_nuclear_outline
D178_A1B	0.343141	0.136674	0.118025	0.182007	0.680704	0.583119	0.10489	6.50262e-06	0.522266	0.900507	0.6813	0.103177	0.567521	0.260608	0.908196	0.0390425	Nuclear_long_axis_length
DCV195_C	0.877322	0.370874	0.0721298	0.855576	0.528608	0.375704	0.604008	2.00237e-05	0.503274	0.755077	0.887982	0.00103259	0.0448598	0.08181	0.587391	0.00100954	Noise_of_maximal_intensity_of_nuclear_brightness_divided_by_average_in_bud
C104_A1B	0.936903	0.879347	0.708107	0.273607	0.401382	0.118189	0.134457	5.47083e-14	0.955273	0.215624	0.791005	0.0054615	0.0141518	0.0190923	0.489977	5.47588e-06	Short_axis_length_in_mother
C104_C	0.707393	0.879143	0.88578	0.0137022	0.452712	0.0450768	0.103725	5.16693e-16	0.848044	0.372593	0.411209	0.00792834	0.00928033	0.00971711	0.682691	8.2188e-08	Short_axis_length_in_mother
C109_A1B	0.34973	0.729786	0.417327	0.00284248	0.00634406	0.0348606	0.0175308	1.02515e-20	0.0500748	0.0237712	0.590839	1.50865e-05	0.200564	0.0869531	0.880312	9.27498e-09	Neck_width
C109_C	0.40252	0.691286	0.786669	0.00200348	0.00528308	0.0911678	0.196712	5.61916e-16	0.305013	0.103891	0.740657	0.0148878	0.0351091	0.00310266	0.410199	8.66417e-07	Neck_width
D14-2_C	0.109106	0.974795	0.646388	0.760201	0.531667	0.339677	0.363491	5.65089e-08	0.0576709	0.0542374	0.520317	0.339766	0.183443	0.0748201	0.517521	0.00303818	Nuclear_size_in_bud
D174_C	0.236139	0.757622	0.48306	0.792779	0.181641	0.868832	0.384356	3.67093e-07	0.273144	0.37548	0.642624	0.0398491	0.115408	0.0785968	0.90791	0.000103984	Maximal_distance_between_nuclear_gravity_center_and_nuclear_outline_in_bud
D177_C	0.210169	0.823683	0.640886	0.832492	0.204018	0.902977	0.281194	2.15871e-07	0.13205	0.266432	0.610351	0.0439831	0.105702	0.0667851	0.876421	9.16036e-05	Nuclear_long_axis_length_in_bud
DCV197_C	0.53592	0.90915	0.713193	0.796393	0.468889	0.971076	0.614488	9.09593e-07	0.6798	0.572861	0.974109	0.368915	0.453002	0.307793	0.839447	0.00135668	Noise_of_ratio_of_nuclear_size
DCV198_C	0.528968	0.936222	0.896067	0.509037	0.533012	0.779497	0.62128	2.11357e-06	0.721781	0.424501	0.927556	0.3489	0.372791	0.270829	0.860385	0.00105339	Noise_of_ratio_of_nuclear_brightness
D15-1_A	0.83621	0.919822	0.7515	0.953392	0.523988	0.133902	0.119398	0.00285261	0.581067	0.470098	0.889501	0.165878	0.924986	0.151834	0.995266	0.0118178	Nuclear_brightness
D15-2_C	0.981772	0.532568	0.892029	0.965396	0.931665	0.11408	0.251386	0.0043317	0.379719	0.514621	0.902155	0.637777	0.680102	0.102019	0.851896	0.020901	Nuclear_brightness_in_bud
DCV180_C	0.117892	0.86431	0.35083	0.0313708	0.652152	0.367455	0.0944656	3.49999e-05	0.0793589	0.192434	0.555753	0.420866	0.190642	0.0980287	0.396769	1.04556e-06	Noise_of_nuclear_minimum_radius_in_bud
D15-3_A1B	0.944849	0.724754	0.537291	0.350396	0.417225	0.514828	0.161616	0.00328646	0.366397	0.697365	0.913711	0.245736	0.476426	0.375947	0.828418	0.0138501	Nuclear_brightness
CCV108_C	0.149534	0.756054	0.390856	0.133644	0.503229	0.694273	0.25501	0.000181969	0.794754	0.656538	0.121557	0.360522	0.876839	0.496301	0.833634	0.00421285	Noise_of_short_axis_length_in_bud
DCV104_A1B	0.894561	0.248992	0.296359	0.000887808	0.908226	0.0279608	0.0276927	1.85461e-07	0.329431	0.0865865	0.626889	0.955066	0.536608	0.351886	0.00890263	0.00600498	Noise_of_distance_between_nuclear_gravity_center_and_mother_tip
DCV126_A1B	0.835705	0.161975	0.300947	0.00534736	0.659003	0.0636142	0.0105962	4.38183e-05	0.209125	0.117008	0.902835	0.201552	0.560262	0.891596	0.208566	0.0858312	Noise_of_distance_between_nuclear_gravity_center_and_mother_hip
A103_A1B	0.955867	0.70827	0.522205	0.0812861	0.691374	0.145189	0.26206	0.00158425	0.309022	0.175212	0.942876	0.715454	0.572931	0.542312	0.82464	0.260366	Relative_distance_of_actin_patch_center_from_neck_in_mother
CCV115_C	0.82166	0.711212	0.430324	0.0104093	0.136256	0.0231322	0.0377254	1.01849e-05	0.14416	0.119245	0.822373	0.000462501	0.242192	0.881758	0.900155	0.808823	Noise_of_mother_axis_ratio
CCV115_A1B	0.852617	0.591997	0.673469	0.00158616	0.890966	0.716992	0.207703	0.00171699	0.684862	0.892263	0.141347	0.000537987	0.163787	0.34886	0.0121029	0.522819	Noise_of_mother_axis_ratio
DCV136_A1B	0.336006	0.593067	0.210471	1.21967e-05	0.867762	0.275375	0.260226	0.0464918	0.530473	0.795616	0.86556	0.00137446	0.635211	0.159709	0.151331	0.759079	Noise_of_distance_between_nuclear_brightest_point_and_mother_center
DCV129_A1B	0.169526	0.532959	0.518044	0.00109793	0.834207	0.142524	0.107424	0.0149678	0.340915	0.345293	0.973088	0.119689	0.776314	0.135559	0.0519307	0.349937	Noise_of_distance_between_nuclear_brightest_point_and_mother_tip
DCV142_A1B	0.107486	0.524433	0.404166	0.00118638	0.80012	0.141934	0.0522248	0.0472883	0.255622	0.28813	0.816066	0.0123026	0.811176	0.322901	0.218281	0.596437	Noise_of_distance_between_nuclear_brightest_point_and_mother_hip
DCV196_A1B	0.740367	0.150494	0.88669	0.00596165	0.170357	0.945785	0.484863	0.00201811	0.57629	0.585722	0.888278	0.0189315	0.0309531	0.930089	0.360382	0.138699	Noise_of_maximal_intensity_of_nuclear_brightness_divided_by_average
DCV118_A1B	0.293259	0.159894	0.186004	0.00083168	0.698558	0.273487	0.0045849	1.01338e-10	0.807048	0.930601	0.954748	0.00429878	0.146325	0.210551	0.126294	0.858058	Noise_of_distance_between_nuclear_gravity_center_and_mother_center
CCV114_C	0.171178	0.403883	0.832989	0.00234446	0.686898	0.762642	0.623422	1.26353e-11	0.901269	0.535164	0.0510337	0.0330002	0.0478754	0.56182	0.0271021	0.133162	Noise_of_bud_axis_ratio
DCV196_C	0.704927	0.567738	0.286467	0.896405	0.293671	0.65777	0.65359	0.00265601	0.157427	0.0806589	0.301564	0.164166	0.234024	0.974745	0.310058	0.543844	Noise_of_maximal_intensity_of_nuclear_brightness_divided_by_average_in_whole_cell
D213	0.177446	0.500536	0.486824	0.42237	0.238398	0.294623	0.956622	9.4046e-06	0.426408	0.219636	0.179298	0.327053	0.646425	0.111146	0.792914	0.646588	Nuclear_C_ratio_to_nuclear_AA1BC_cells
D216	0.0797221	0.517439	0.542819	0.484699	0.073685	0.317842	0.952136	0.00015277	0.573022	0.0895085	0.148333	0.118547	0.250878	0.374955	0.824851	0.908323	Nuclear_C_ratio_to_nuclear_A1BC_cells
DCV169_C	0.404139	0.180715	0.784179	0.318198	0.635595	0.306532	0.854515	6.78032e-05	0.578925	0.353137	0.930853	0.0111248	0.943734	0.925823	0.661886	0.32216	Noise_of_angle_between_C4-1D1-1_and_C4-1C1
DCV189_C	0.866749	0.877278	0.971817	0.762599	0.959637	0.454418	0.855174	0.000259336	0.170737	0.18686	0.364019	0.196784	0.696214	0.45372	0.727688	0.775412	Noise_of_distance_between_nuclear_gravity_center_and_brightest_point_in_bud
A111	0.463707	0.569062	0.835479	0.0702849	0.000963906	0.63034	0.265475	6.60358e-07	0.798589	0.913978	0.816303	0.292987	0.428621	0.605376	0.444395	0.0411138	Actin_ae_ratio
A109	0.633988	0.628652	0.620483	0.195969	0.00626189	0.192544	0.0550742	1.08523e-06	0.253616	0.886975	0.667031	0.00937454	0.59065	0.619383	0.801195	0.057257	Actin_e_ratio
A118	0.504281	0.694748	0.726529	0.293922	0.00127236	0.223946	0.0452751	0.000110406	0.421514	0.958869	0.77257	0.0154168	0.257334	0.616509	0.442201	0.0129751	Actin_e_ratio_to_budded_cells
ACV123_A1B	0.652083	0.664972	0.443834	0.0625675	0.0328041	0.944694	0.807641	2.43022e-07	0.593602	0.946734	0.504086	0.837365	0.353571	0.429944	0.679235	0.295955	Noise_of_ratio_of_actin_patches_to_actin_region
CCV13_C	0.793313	0.0784913	0.0878742	3.99425e-08	0.0312484	0.742241	0.933221	4.7228e-09	0.668855	0.765386	0.73456	0.865693	0.92739	0.43521	0.991628	0.217534	Noise_of_mother_cell_fitness_for_ellipse
ACV8-2_A1B	0.492034	0.814485	0.749813	0.00893912	0.160515	0.398479	0.968123	4.28836e-05	0.902844	0.679618	0.949163	0.753912	0.79834	0.675395	0.859237	0.203489	Noise_of_total_brightness_of_actin_region_in_bud
ACV120_A1B	0.96867	0.952723	0.924194	0.0187217	0.0389636	0.366048	0.225712	0.00214298	0.184096	0.821091	0.827358	0.485363	0.536304	0.62787	0.856451	0.71037	Noise_of_total_length_of_actin_patch_link
ACV121_A1B	0.697162	0.805418	0.974028	0.0764216	0.0737981	0.322122	0.275213	0.000153009	0.267759	0.909033	0.744909	0.41945	0.459646	0.691848	0.934625	0.765913	Noise_of_maximal_distance_between_patches
ACV101_A1B	0.211656	0.717574	0.888877	0.00761791	0.201959	0.843913	0.427529	2.95681e-14	0.674656	0.407577	0.246382	0.346781	0.645685	0.149891	0.68234	0.287412	Noise_of_actin_region_ratio_in_whole_cell
DCV162_C	0.106802	0.331189	0.130952	0.813321	0.651448	0.191131	0.274399	1.16099e-05	0.520705	0.574086	0.977177	0.262929	0.399337	0.875482	0.756038	0.473796	Noise_of_angle_between_D1-1D1-2_and_C1C4-1
A7-1_A	0.753178	0.818967	0.628833	0.0267225	0.0118662	0.235402	0.191618	4.08974e-10	0.113675	0.449189	0.509279	0.00106294	0.0740838	0.765918	0.894984	0.0428214	Size_of_actin_region
ACV121_C	0.675471	0.178517	0.499471	0.115938	0.0112792	0.913051	0.605992	0.000126627	0.878942	0.844387	0.366587	0.762932	0.157252	0.797475	0.76896	0.315055	Noise_of_maximal_distance_between_patches
A113_A	0.939963	0.942757	0.887288	0.776956	0.0911617	0.328006	0.960881	0.000239757	0.790699	0.801699	0.330303	0.298508	0.321339	0.371377	0.573693	0.604792	Actin_n_ratio
D143_A1B	0.120309	0.846532	0.584067	0.0256867	0.451441	0.65825	0.975793	1.37528e-06	0.850254	0.847202	0.426013	0.0223239	0.356802	0.203989	0.138201	0.91625	Distance_between_nuclear_outline_point_D6-1_and_middle_point_of_neck
D110_A1B	0.386556	0.747213	0.554436	0.0124958	0.0979031	0.435735	0.0742413	1.77473e-07	0.72676	0.789289	0.585288	0.0494447	0.73311	0.528641	0.0732232	0.449885	Distance_between_nuclear_gravity_center_and_middle_point_of_neck
D132_A1B	0.127331	0.950727	0.770873	3.32142e-06	0.246993	0.268744	0.407248	6.08778e-13	0.672713	0.395769	0.415205	0.00411441	0.828026	0.594657	0.194749	0.40719	Distance_between_nuclear_brightest_point_and_middle_point_of_neck
CCV117_C	0.261384	0.919455	0.57999	2.39724e-05	0.859056	0.93367	0.466185	0.263882	0.949491	0.835072	0.631627	0.410391	0.759481	0.778293	0.699073	0.391103	Noise_of_cell_outline_ratio
CCV118_C	0.21297	0.989018	0.572521	3.88544e-05	0.985954	0.800971	0.622177	0.117682	0.977621	0.934167	0.794019	0.43307	0.828029	0.775489	0.617728	0.486962	Noise_of_cell_size_ratio
D196_A1B	0.503047	0.620756	0.0657781	0.00728091	0.488808	0.646218	0.807165	0.00154317	0.569193	0.987485	0.797274	0.92456	0.506035	0.842599	0.613365	0.62534	Maximal_intensity_of_nuclear_brightness_divided_by_average
C12-2_A1B	0.63603	0.92626	0.357986	0.0043326	0.919532	0.951768	0.728821	6.80949e-05	0.117965	0.305268	0.877461	0.965152	0.551592	0.543381	0.698583	0.643118	Bud_cell_outline_length
C107_A1B	0.38668	0.884147	0.452201	0.00172507	0.52941	0.6038	0.515829	0.0028616	0.128058	0.485414	0.843393	0.362864	0.640252	0.654028	0.888782	0.334655	Long_axis_length_in_bud
A7-2_C	0.351685	0.233365	0.469838	0.000438335	0.816343	0.750516	0.593008	0.00127878	0.805625	0.486564	0.855914	0.0626274	0.326554	0.743283	0.918096	0.000665066	Size_of_actin_region_in_bud
A8-1_A	0.685107	0.768968	0.201923	0.00153739	0.87148	0.962604	0.503259	0.0051571	0.642522	0.574422	0.837662	0.0252269	0.85023	0.561083	0.79868	0.162809	Actin_region_brightness
A7-2_A1B	0.966234	0.844413	0.239085	2.11878e-05	0.57623	0.763409	0.569228	0.000347588	0.425827	0.393797	0.79618	0.0949244	0.477412	0.481992	0.676651	0.0647749	Size_of_actin_region_in_bud
DCV146_C	0.397844	0.940132	0.00823007	1.20865e-05	0.281055	0.592578	0.36743	0.381506	0.779385	0.0948897	0.113558	0.858876	0.39105	0.353511	0.33293	0.153237	Noise_of_distance_between_nuclear_outline_point_D8_in_bud_and_bud_tip
DCV113_C	0.673527	0.803977	0.140271	1.66803e-05	0.751333	0.627565	0.949068	0.504237	0.78805	0.696964	0.479922	0.401154	0.925397	0.796517	0.539576	0.0175235	Noise_of_ratio_of_D109_to_C107
DCV123_C	0.760925	0.847247	0.186517	3.59243e-05	0.351016	0.19676	0.630966	0.508551	0.921244	0.823395	0.357803	0.325222	0.928501	0.922234	0.318183	0.0251155	Noise_of_ratio_of_D121_to_C107
DCV116_C	0.545185	0.512057	0.0299007	0.00732053	0.7318	0.901569	0.605431	8.4788e-05	0.504651	0.249369	0.479069	0.148829	0.981642	0.944723	0.627034	0.000601005	Noise_of_distance_between_two_nuclear_gravity_centers_through_middle_point_of_neck
DCV134_C	0.654794	0.288985	0.0448745	0.0923905	0.415429	0.527086	0.0375757	1.31162e-08	0.593679	0.322308	0.342237	0.147118	0.378888	0.483726	0.658591	0.00119601	Noise_of_distance_between_two_nuclear_brightest_points_through_middle_point_of_neck
DCV109_C	0.558035	0.631343	0.198633	0.00634167	0.626901	0.603155	0.927928	1.1363e-06	0.600867	0.911701	0.737873	0.809414	0.94634	0.977166	0.798096	0.0110807	Noise_of_distance_between_nuclear_gravity_center_in_bud_and_middle_point_of_neck
DCV144_C	0.309887	0.58643	0.0737243	0.0559822	0.678449	0.642679	0.816499	0.000721437	0.448737	0.898918	0.835646	0.221774	0.893241	0.75847	0.221499	0.0145279	Noise_of_distance_between_nuclear_outline_point_D6-2_in_bud_and_middle_point_of_neck
C11-2_A1B	0.580933	0.945579	0.388869	0.0401898	0.80845	0.721428	0.997613	2.27158e-08	0.101554	0.174747	0.823653	0.636793	0.294765	0.3137	0.665849	0.621726	Bud_cell_size
C108_A1B	0.91414	0.480484	0.143662	0.313698	0.402631	0.054589	0.266797	1.81902e-12	0.144491	0.0617806	0.644773	0.0119597	0.226136	0.141504	0.47476	0.0301302	Short_axis_length_in_bud
D129_A1B	0.807973	0.798745	0.395777	0.116299	0.0675944	0.724744	0.874661	2.9247e-14	0.1715	0.364998	0.96313	0.465361	0.0686914	0.30266	0.847497	2.21786e-05	Distance_between_nuclear_brightest_point_and_mother_tip
D142_A1B	0.753336	0.750625	0.403549	0.108573	0.159697	0.822888	0.961234	4.80576e-13	0.250017	0.385527	0.974402	0.534033	0.0482651	0.222772	0.652408	7.0186e-05	Distance_between_nuclear_brightest_point_and_mother_hip
D104_A1B	0.831117	0.943914	0.849434	0.100299	0.135152	0.592296	0.511398	7.73363e-15	0.235236	0.245678	0.853831	0.216156	0.047227	0.390148	0.712084	3.67093e-05	Distance_between_nuclear_gravity_center_and_mother_tip
D126_A1B	0.765584	0.990331	0.897395	0.0870656	0.351747	0.717511	0.45496	1.82549e-13	0.318913	0.270255	0.862656	0.271515	0.0402139	0.319575	0.546934	0.000154789	Distance_between_nuclear_gravity_center_and_mother_hip
C11-1_A	0.785414	0.759407	0.931121	0.0011538	0.725347	0.122878	0.178632	2.51926e-13	0.987836	0.407112	0.843406	0.758727	0.0192599	0.0969829	0.633253	0.000323558	Whole_cell_size
C12-1_A	0.885642	0.904534	0.820237	0.000194277	0.659785	0.219779	0.242376	3.2533e-13	0.849634	0.495367	0.84085	0.939302	0.0302961	0.133176	0.627897	0.000656755	Whole_cell_outline_length
D185_C	0.660522	0.596976	0.63505	0.00546468	0.364094	0.184973	0.656979	4.09205e-15	0.281473	0.89113	0.958445	0.636347	0.0574062	0.303257	0.755762	0.0904769	Total_length_of_two_straight_segments_D11-1C4-1_and_D11-2C4-1
D186_C	0.808261	0.564597	0.754366	0.0100554	0.491016	0.203469	0.868232	8.49278e-14	0.34243	0.989701	0.905521	0.469577	0.0588238	0.294307	0.724386	0.114021	Total_length_of_two_straight_segments_D12-1C4-1_and_D12-2C4-1
C102_A1B	0.63871	0.846453	0.342219	0.0809044	0.295625	0.464077	0.689416	1.2757e-16	0.161986	0.208533	0.854475	0.455458	0.0541567	0.156054	0.628512	0.00389222	Whole_cell_outline_length
C102_C	0.73552	0.689115	0.681919	0.107004	0.490708	0.0969491	0.418942	3.53015e-14	0.500846	0.52824	0.878709	0.903601	0.0434015	0.139854	0.625006	0.0046293	Whole_cell_outline_length
DCV131_C	0.287573	0.613478	0.193628	0.195622	0.961206	0.675687	0.282927	8.03133e-11	0.668313	0.522599	0.855974	0.204191	0.476983	0.384677	0.842325	0.0190422	Noise_of_distance_between_nuclear_brightest_point_in_bud_and_middle_point_of_neck
C11-1_C	0.540639	0.84072	0.712376	0.0956756	0.102268	0.152646	0.27477	1.33824e-21	0.466723	0.454829	0.448905	0.103243	0.0301349	0.0601083	0.89321	9.73067e-08	Mother_cell_size
C12-1_C	0.512329	0.911153	0.564409	0.296022	0.134628	0.252917	0.416809	1.78058e-22	0.470306	0.586226	0.492533	0.204502	0.0594635	0.167143	0.961503	2.32511e-07	Mother_cell_outline_length
C101_C	0.693456	0.66941	0.806299	0.743195	0.258204	0.0719621	0.284325	4.07543e-16	0.491461	0.429126	0.742791	0.490235	0.0226953	0.0516384	0.593212	0.000299893	Whole_cell_size
C11-1_A1B	0.768689	0.889064	0.566823	0.698669	0.109435	0.212524	0.272046	6.17907e-18	0.44741	0.248665	0.863711	0.112328	0.0255746	0.0956032	0.702949	8.27841e-06	Mother_cell_size
C12-1_A1B	0.764273	0.837678	0.522401	0.759993	0.143425	0.281546	0.409032	9.38651e-18	0.437207	0.335792	0.898233	0.309276	0.0323125	0.14045	0.695822	3.2459e-05	Mother_cell_outline_length
C101_A1B	0.679831	0.888772	0.455638	0.747008	0.149034	0.266776	0.373517	2.70224e-18	0.254541	0.168245	0.822312	0.145092	0.0291877	0.0868334	0.643518	0.00010633	Whole_cell_size
C103_A1B	0.662225	0.834248	0.379206	0.378941	0.0163151	0.475253	0.593606	8.37383e-20	0.128029	0.34692	0.927069	0.979719	0.0929814	0.507129	0.885937	5.17301e-05	Long_axis_length_in_mother
C112_A1B	0.493001	0.862137	0.812971	0.916974	0.087156	0.916559	0.96892	2.28508e-20	0.315443	0.56365	0.965934	0.879719	0.0511394	0.302776	0.656762	2.61659e-06	Distance_between_middle_point_of_neck_and_mother_center
C128_A1B	0.861474	0.897375	0.560336	0.7501	0.100249	0.953076	0.954437	3.49374e-19	0.26053	0.409895	0.804185	0.897127	0.058717	0.501556	0.699953	1.44245e-05	Distance_between_middle_point_of_neck_and_mother_hip
C103_C	0.423695	0.781681	0.563789	0.725083	0.0122145	0.580462	0.82847	3.03515e-24	0.186865	0.594284	0.686677	0.751722	0.159259	0.416692	0.765817	1.73347e-06	Long_axis_length_in_mother
C112_C	0.29037	0.572929	0.778058	0.516118	0.291278	0.639327	0.99708	6.18529e-26	0.261637	0.582804	0.80025	0.780781	0.124512	0.33298	0.467717	4.33814e-08	Distance_between_middle_point_of_neck_and_mother_center
C128_C	0.694664	0.704056	0.610711	0.697587	0.264373	0.633568	0.963873	4.2978e-23	0.172631	0.482338	0.918967	0.541746	0.103892	0.493586	0.491861	5.17721e-07	Distance_between_middle_point_of_neck_and_mother_hip
D118_A1B	0.733493	0.572134	0.552514	0.017639	0.613508	0.665647	0.347827	2.84906e-06	0.420776	0.141227	0.829566	0.00821439	0.0442828	0.137391	0.127058	0.034575	Distance_between_nuclear_gravity_center_and_mother_center
D145_A1B	0.656216	0.382155	0.517924	0.0815183	0.457122	0.573487	0.13757	2.33746e-07	0.669899	0.327295	0.967472	0.0906886	0.0404215	0.575054	0.921691	0.0014502	Distance_between_nuclear_outline_point_D7_and_mother_hip
C103_A	0.996818	0.923701	0.518338	2.44337e-06	0.194748	0.678686	0.675465	6.6999e-13	0.569428	0.808253	0.833147	0.151032	0.0433602	0.372401	0.896371	0.00324776	Long_axis_length_in_whole_cell
D102_A	0.576685	0.980618	0.584821	1.92276e-06	0.195704	0.985068	0.538514	1.7409e-11	0.756357	0.180182	0.874909	0.0115778	0.0151645	0.149245	0.352445	0.0122333	Distance_between_nuclear_gravity_center_and_mother_tip
D127_A	0.812631	0.473812	0.206316	3.92166e-07	0.35243	0.832457	0.834719	7.31616e-13	0.882048	0.14632	0.592079	0.0540756	0.0267335	0.173856	0.501944	0.0154828	Distance_between_nuclear_brightest_point_and_cell_tip
D136_A1B	0.813071	0.833125	0.521589	0.0808704	0.249956	0.918015	0.463901	1.85542e-06	0.359779	0.293597	0.729257	0.222783	0.0800073	0.051563	0.260302	0.00736327	Distance_between_nuclear_brightest_point_and_mother_center
D117_C	0.579895	0.532184	0.613535	0.01763	0.340914	0.919847	0.473156	2.19805e-08	0.71391	0.0972521	0.783757	0.0582388	0.00901057	0.0251392	0.768341	0.00191449	Distance_between_nuclear_gravity_center_in_mother_and_mother_center
C111_A1B	0.580131	0.854647	0.931498	0.331928	0.698549	0.0276829	0.191315	4.93259e-07	0.298701	0.685908	0.732923	0.142773	0.357314	0.873813	0.413004	0.0904807	Distance_between_bud_tip_and_mother_short_axis_extension
C111_C	0.956478	0.407601	0.822746	0.0573609	0.259028	0.941115	0.683387	9.72254e-05	0.199491	0.475713	0.245619	0.269204	0.445668	0.68599	0.253336	0.105687	Distance_between_bud_tip_and_mother_short_axis_extension
CCV12-2_A1B	0.986146	0.799682	0.956323	0.69864	0.0406989	0.0385239	0.277185	0.000759176	0.689717	0.743572	0.665567	0.115103	0.105673	0.47066	0.489149	0.558045	Noise_of_bud_cell_outline_length
CCV107_A1B	0.850403	0.653144	0.652426	0.251625	0.27798	0.0829897	0.363958	0.000990939	0.914539	0.796072	0.369229	0.049349	0.165442	0.719525	0.521847	0.130912	Noise_of_long_axis_length_in_bud
DCV179_C	0.115462	0.652641	0.852376	0.87086	0.5316	0.0561914	0.371884	0.000111564	0.540932	0.653349	0.31353	0.530389	0.889082	0.384941	0.800404	0.501448	Noise_of_nuclear_minimum_radius_in_mother
C122	0.568662	0.591639	0.42477	0.489842	0.856144	0.258773	0.637294	0.00105657	0.238526	0.803421	0.577022	0.892131	0.623477	0.08001	0.213348	0.594505	Large_bud_ratio
C113_C	0.021547	0.105469	0.98659	0.193454	0.655686	0.194829	0.502587	0.00437463	0.313801	0.592706	0.52207	0.459271	0.00414643	0.0203864	0.852424	0.483644	Distance_between_bud_tip_and_mother_long_axis_through_middle_point_of_neck
C113_A1B	0.492491	0.296411	0.883201	0.0695317	0.704227	0.557703	0.885154	1.70098e-05	0.73656	0.142332	0.155942	0.265043	0.062563	0.579411	0.76157	0.945079	Distance_between_bud_tip_and_mother_long_axis_through_middle_point_of_neck
C11-2_C	0.969462	0.512677	0.949785	0.00262358	0.692486	0.0375508	0.318376	8.38179e-07	0.566516	0.430627	0.780357	0.452043	0.0303089	0.0661071	0.341938	0.429714	Bud_cell_size
C104_A	0.598601	0.744808	0.836903	0.061159	0.507768	0.0244861	0.0709926	5.57749e-10	0.643427	0.211807	0.91837	0.0712683	0.0170896	0.0283881	0.342283	0.000456494	Short_axis_length_in_whole_cell
C108_C	0.958998	0.471574	0.89661	0.120138	0.651678	0.005412	0.0725334	5.06797e-06	0.778346	0.343635	0.964737	0.639182	0.0134123	0.0141384	0.216041	0.0858216	Short_axis_length_in_bud
D135_A	0.67829	0.390662	0.736203	3.99274e-05	0.692152	0.824923	0.730074	0.00482754	0.895352	0.0331694	0.384685	0.0257007	0.0299397	0.0704104	0.0833839	0.996232	Distance_between_nuclear_brightest_point_and_cell_center
C12-2_C	0.939192	0.538323	0.861853	3.1727e-05	0.804005	0.0477467	0.456064	0.000557607	0.607424	0.5218	0.651319	0.100869	0.0608074	0.169257	0.319739	0.753257	Bud_cell_outline_length
C107_C	0.779456	0.508185	0.80468	8.78674e-06	0.34399	0.187742	0.806836	0.000239247	0.47439	0.703657	0.610028	0.0190446	0.150928	0.441206	0.547891	0.380283	Long_axis_length_in_bud
DCV143_C	0.108479	0.19476	0.0955587	0.0184779	0.955475	0.710414	0.441406	0.00196802	0.382535	0.488472	0.63291	0.200359	0.285663	0.0579047	0.557663	0.933994	Noise_of_distance_between_nuclear_outline_point_D6-1_in_mother_and_middle_point_of_neck
D135_C	0.837585	0.104352	0.14573	0.0283267	0.121972	0.722802	0.0449236	5.97495e-07	0.874529	0.526327	0.374253	0.492651	0.0218124	0.0589932	0.965118	0.00679681	Distance_between_nuclear_brightest_point_in_mother_and_mother_center
DCV130_C	0.354422	0.107693	0.0696764	0.00937336	0.470415	0.360698	0.0316948	0.000137167	0.930398	0.455062	0.433684	0.016802	0.0164948	0.0825613	0.357124	0.0574909	Noise_of_distance_between_nuclear_brightest_point_in_mother_and_middle_point_of_neck
DCV152_C	0.294381	0.730354	0.548055	0.489362	0.767757	0.905428	0.0920414	0.178698	0.140936	0.345837	0.875411	0.358615	0.507049	0.968059	0.990709	4.70659e-05	Noise_of_mobility_of_nucleus_in_mother
A104_A1B	0.400571	0.254427	0.248146	0.616053	0.704123	0.238556	0.824413	0.0251229	0.807982	0.0916617	0.524298	0.00353436	0.295992	0.545022	0.606666	4.2092e-07	Relative_distance_of_actin_patch_center_from_neck_in_bud
A104_C	0.146259	0.406503	0.908204	0.784103	0.0850188	0.108804	0.350443	0.0010903	0.432602	0.731561	0.860466	0.0138016	0.692887	0.904735	0.809288	4.83325e-08	Relative_distance_of_actin_patch_center_from_neck_in_bud
A112_A1B	0.952528	0.743541	0.365332	0.549549	0.0669527	0.922719	0.307404	0.531054	0.469574	0.867713	0.861751	0.000845207	0.0152167	0.220576	0.659767	3.2781e-05	Actin_cd_ratio
CCV105_A1B	0.522566	0.506427	0.312348	0.301999	0.989337	0.985233	0.858386	0.829773	0.433174	0.838054	0.714129	0.197215	0.270244	0.606602	0.668204	0.000847486	Noise_of_neck_position
CCV106_A1B	0.62381	0.663394	0.339961	0.089041	0.830565	0.984151	0.959091	0.401169	0.7916	0.707873	0.992104	0.0221115	0.454204	0.57641	0.604624	0.00120032	Noise_of_bud_direction
DCV165_A1B	0.0378243	0.547148	0.749346	0.813963	0.0296682	0.146757	0.686444	0.0867967	0.534161	0.500281	0.230293	0.00425523	0.0612904	0.117628	0.661721	0.219669	Noise_of_angle_between_D3-1D4-1_and_C1C4-1_or_between_D3-3D4-3_and_C1C4-1
A102_C	0.928669	0.221848	0.49023	0.826958	0.889911	0.630723	0.932924	0.454433	0.985131	0.510398	0.839383	0.00045897	0.100501	0.179519	0.18189	3.36632e-05	Bud_actin_region_ratio_to_total_region
A108_C	0.853693	0.0448496	0.0705708	0.0816368	0.870473	0.99031	0.945536	0.197595	0.626926	0.385546	0.842983	0.00159971	0.130416	0.250906	0.947643	0.00743356	Actin_d_iso_ratio
A112_C	0.55107	0.0621722	0.304316	0.27942	0.727328	0.474584	0.346822	0.0356467	0.449396	0.423702	0.738427	0.010431	0.405857	0.723988	0.999645	0.00438916	Actin_cd_ratio
DCV153_C	0.977395	0.525689	0.812989	0.0590301	0.346752	0.797368	0.772741	0.343878	0.0367236	0.0404305	0.110481	0.00072322	0.0878727	0.612482	0.847774	0.0334178	Noise_of_mobility_of_nucleus_in_bud
A8-2_A1B	0.772568	0.496283	0.0878931	0.0183043	0.862371	0.781454	0.351941	0.00196069	0.379705	0.17792	0.435575	0.00066314	0.989033	0.435534	0.402598	0.0145175	Total_brightness_of_actin_region_in_bud
A8-2_C	0.844096	0.138908	0.135329	0.00387229	0.705463	0.680634	0.607614	3.63928e-05	0.699189	0.869958	0.506341	8.8084e-05	0.025415	0.747162	0.988958	0.00367899	Total_brightness_of_actin_region_in_bud
A122_C	0.977471	0.189071	0.142863	0.151114	0.922932	0.902724	0.203499	0.0724895	0.836531	0.952645	0.220043	0.00289555	0.166936	0.964565	0.762634	0.373003	Number_of_bright_actin_patches
D161_A1B	0.612374	0.281839	0.140534	0.149561	0.948057	0.725635	0.228457	0.0285008	0.748718	0.0833354	0.468889	0.0636482	0.173528	0.527353	0.845866	0.00256884	Angle_between_D3-1D4-1_and_C1-1C1-2_or_between_D3-3D4-3_and_C1-1C1-2
ACV102_C	0.140434	0.736653	0.18905	0.0149319	0.211759	0.0140932	0.397259	1.30174e-05	0.491022	0.622019	0.285369	0.251468	0.115184	0.157205	0.0253553	1.57168e-05	Noise_of_bud_actin_region_ratio_to_total_region
CCV107_C	0.188356	0.61847	0.697945	0.107916	0.201181	0.659453	0.686012	1.54795e-12	0.781859	0.811468	0.99715	0.363155	0.685446	0.818422	0.333598	9.36395e-05	Noise_of_long_axis_length_in_bud
CCV11-2_C	0.14559	0.629781	0.499525	0.22825	0.445327	0.794358	0.419683	2.82014e-07	0.990066	0.876897	0.672197	0.0853166	0.974789	0.838737	0.242235	1.04474e-05	Noise_of_bud_cell_size
CCV12-2_C	0.148282	0.609158	0.533725	0.868117	0.484093	0.6927	0.289742	2.14207e-08	0.966879	0.950222	0.831477	0.295327	0.784158	0.995556	0.188466	2.41615e-05	Noise_of_bud_cell_outline_length
D204	0.194667	0.987143	0.739377	0.00080464	0.954638	0.62856	0.313841	9.19775e-11	0.840637	0.662291	0.844827	0.000255752	0.0352758	0.885971	0.30049	2.31447e-05	Nuclear_E_ratio
D179_C	0.247452	0.638369	0.741039	0.0460078	0.489342	0.848141	0.390877	3.18114e-06	0.31053	0.61925	0.709752	0.0286218	0.889145	0.947619	0.144591	2.51734e-05	Nuclear_minimum_radius_in_mother
D14-3_C	0.084058	0.499767	0.328718	0.0675987	0.397593	0.827333	0.212616	4.90962e-10	0.123262	0.288874	0.680359	0.0221117	0.449402	0.516254	0.43718	7.42303e-05	Nuclear_size_in_whole_cell
D14-1_C	0.156605	0.395738	0.330765	0.0462505	0.481665	0.939011	0.269893	3.21256e-07	0.278726	0.737458	0.950081	0.0225872	0.82607	0.96793	0.18363	0.000446363	Nuclear_size_in_mother
D173_C	0.155676	0.283172	0.264701	0.0864552	0.4505	0.75451	0.407964	1.22696e-05	0.287202	0.703068	0.969961	0.0449124	0.620971	0.849909	0.27589	0.000933532	Maximal_distance_between_nuclear_gravity_center_and_nuclear_outline_in_mother
D176_C	0.177003	0.303658	0.27626	0.0772823	0.411022	0.805934	0.392163	6.87803e-06	0.250916	0.70169	0.982712	0.0366847	0.661444	0.928536	0.278615	0.00131539	Nuclear_long_axis_length_in_mother
D189_C	0.129231	0.495366	0.669291	0.272169	0.36047	0.995851	0.055985	6.3997e-05	0.741626	0.972176	0.3713	0.00252838	0.385965	0.290447	0.13205	7.75259e-06	Distance_between_nuclear_gravity_center_and_brightest_point_in_bud
D15-1_C	0.525841	0.787345	0.525272	0.341066	0.901841	0.400388	0.25618	0.000551903	0.565812	0.270742	0.904313	0.0400839	0.485927	0.998385	0.0821643	0.00140104	Nuclear_brightness_in_mother
D15-3_C	0.679534	0.946261	0.7196	0.483719	0.891691	0.234096	0.205968	0.000307681	0.467519	0.330687	0.944969	0.0923016	0.767598	0.509066	0.248253	0.00137367	Nuclear_brightness_in_whole_cell
CCV110_A1B	0.200325	0.18569	0.638628	0.510599	0.811957	0.545811	0.375689	2.61112e-07	0.891554	0.744366	0.746614	0.0146878	0.962551	0.984255	0.259784	8.18669e-11	Noise_of_distance_between_bud_tip_and_mother_long_axis_extension
D203	0.423644	0.669562	0.65987	0.0190172	0.0534656	0.853884	0.390714	4.73781e-05	0.411273	0.853049	0.958588	0.00181602	0.668678	0.873933	0.208771	1.29308e-05	Nuclear_D_ratio
D106_C	0.435305	0.79934	0.903857	1.35729e-09	0.0883752	0.431529	0.553673	5.79519e-12	0.795193	0.945687	0.913211	3.69854e-07	0.570811	0.250401	0.0669232	8.22029e-17	Ratio_of_D103_to_C103
D145_C	0.459993	0.801565	0.417622	1.35915e-07	0.154624	0.507999	0.655001	1.54759e-19	0.781509	0.920601	0.645873	0.000281812	0.68452	0.371334	0.0533923	1.88564e-16	Distance_between_nuclear_outline_point_D7_in_mother_and_mother_hip
D103_C	0.282833	0.912947	0.698384	2.18976e-07	0.00812228	0.730535	0.509932	3.5157e-22	0.408285	0.827308	0.903751	6.2157e-05	0.792373	0.529457	0.0792157	2.7831e-17	Distance_between_nuclear_gravity_center_in_mother_and_mother_tip
D128_C	0.273869	0.984029	0.998153	1.96726e-07	0.00310891	0.637981	0.311215	8.14554e-19	0.639885	0.730901	0.613466	0.000182978	0.758652	0.669219	0.0756293	1.23472e-15	Distance_between_nuclear_brightest_point_in_mother_and_mother_tip
D125_C	0.331575	0.880292	0.6706	4.62325e-09	0.0644412	0.753595	0.666294	7.52974e-21	0.408815	0.706817	0.647228	2.05786e-05	0.689856	0.346812	0.033658	2.98038e-16	Distance_between_nuclear_gravity_center_in_mother_and_mother_hip
D141_C	0.319957	0.878688	0.965137	8.33546e-10	0.023077	0.676711	0.396774	1.52459e-18	0.656164	0.888973	0.944056	5.22218e-05	0.743671	0.429373	0.0228124	1.38903e-15	Distance_between_nuclear_brightest_point_in_mother_and_mother_hip
ACV7-1_C	0.982585	0.250813	0.0740971	5.41194e-06	0.659029	0.727566	0.486191	2.85252e-09	0.187754	0.949814	0.475672	0.880719	0.9943	0.887479	0.718386	0.000189103	Noise_of_size_of_actin_region_in_mother
ACV8-1_C	0.741534	0.35681	0.556706	0.000967398	0.969442	0.341992	0.247793	0.000188428	0.987098	0.595694	0.445071	0.720642	0.712292	0.60435	0.462393	4.19381e-05	Noise_of_total_brightness_of_actin_region_in_mother
D146_C	0.0452354	0.0220762	0.675686	0.666203	0.574241	0.956199	0.431066	6.04427e-09	0.491361	0.471674	0.00225907	0.140362	0.00868196	0.0915795	0.36176	7.72697e-07	Distance_between_nuclear_outline_point_D8_in_bud_and_bud_tip
D121_C	0.226723	0.0229319	0.172121	0.0764678	0.638498	0.454565	0.459221	6.92276e-12	0.118034	0.334965	0.037194	0.270246	0.0102355	0.279036	0.624134	6.82017e-06	Distance_between_nuclear_gravity_center_in_bud_and_bud_tip
D139_C	0.409345	0.0558314	0.297805	0.0553168	0.928733	0.126123	0.847803	6.10965e-10	0.0449055	0.171174	0.022564	0.0760727	0.0170149	0.239281	0.625793	6.09266e-06	Distance_between_nuclear_brightest_point_in_bud_and_bud_tip
ACV7-1_A1B	0.725282	0.429859	0.517175	0.0287351	0.210495	0.67825	0.460395	3.55824e-14	0.769634	0.298796	0.373266	0.33338	0.817921	0.889478	0.926442	5.72141e-10	Noise_of_size_of_actin_region_in_mother
ACV8-1_A1B	0.943857	0.486223	0.369039	0.00730308	0.00539194	0.961592	0.813689	4.71019e-25	0.506455	0.852877	0.601702	0.816727	0.0875373	0.786773	0.415088	4.91942e-06	Noise_of_total_brightness_of_actin_region_in_mother
CCV104_A	0.922915	0.848154	0.235602	0.00174517	0.959106	0.135604	0.859328	0.00113957	0.598466	0.190159	0.286539	0.894142	0.366904	0.213685	0.239485	0.239694	Noise_of_short_axis_length_in_whole_cell
CCV11-1_A	0.889203	0.431358	0.0678893	0.00160178	0.919274	0.190641	0.916657	0.000272008	0.560298	0.621629	0.837847	0.26672	0.882302	0.651837	0.227953	0.218876	Noise_of_whole_cell_size
CCV12-1_A	0.916882	0.70983	0.132611	0.00374136	0.778042	0.183674	0.98928	0.000340953	0.524034	0.819199	0.682557	0.26176	0.982313	0.685544	0.254273	0.518765	Noise_of_whole_cell_outline_length
CCV101_C	0.204718	0.447719	0.81229	1.95804e-07	0.817174	0.399998	0.57305	0.0610734	0.823087	0.226764	0.23273	0.396375	0.150614	0.185121	0.0707281	0.0125144	Noise_of_whole_cell_size
CCV102_C	0.100272	0.252318	0.806392	1.73622e-05	0.941347	0.347792	0.292038	0.0107558	0.762047	0.309294	0.203725	0.190838	0.31518	0.302063	0.0236581	0.000304367	Noise_of_whole_cell_outline_length
D123_C	0.215726	0.0387366	0.102976	4.28674e-07	0.850344	0.774639	0.310276	6.10582e-08	0.314316	0.630145	0.0826	0.00372295	0.000225483	0.0692752	0.304167	4.93327e-08	Ratio_of_D121_to_C107
DCV185_C	0.352027	0.24394	0.835904	0.000259445	0.463986	0.472152	0.790717	0.00321642	0.547938	0.642728	0.965353	0.093119	0.362315	0.175794	0.283047	0.00182144	Noise_of_total_length_of_two_straight_segments_D11-1C4-1_and_D11-2C4-1
DCV186_C	0.353607	0.319639	0.965349	0.00240949	0.343908	0.371676	0.630481	0.00046265	0.539263	0.800363	0.807287	0.201448	0.357092	0.111907	0.183524	0.00357482	Noise_of_total_length_of_two_straight_segments_D12-1C4-1_and_D12-2C4-1
D156_C	0.0354251	0.225177	0.0234638	3.44859e-07	0.776092	0.199146	0.797475	0.00260014	0.281136	0.326463	0.591316	0.0322854	0.037192	0.297249	0.463426	0.033798	Angle_between_C2D1-2_and_C2C4-2
D157_C	0.132395	0.649173	0.357466	0.000319086	0.646557	0.214615	0.733621	0.195743	0.101021	0.134072	0.624274	0.35733	0.14008	0.38416	0.521308	0.201424	Angle_between_C2D2-2_and_C2C4-2
D166_C	0.465522	0.276727	0.063044	3.18878e-05	0.384641	0.0281807	0.805793	0.0692221	0.132584	0.218636	0.636853	0.346038	0.0730279	0.489331	0.45006	0.0879374	Angle_between_D1-1D1-2_and_C4-1C4-2
D167_C	0.825497	0.688371	0.227449	7.58035e-06	0.64512	0.00636798	0.111529	0.0614505	0.373297	0.5058	0.811451	0.772629	0.202083	0.490533	0.955806	0.0125138	Angle_between_D2-1D2-2_and_C4-1C4-2
D162_C	0.103654	0.500028	0.633804	6.13768e-06	0.0419779	0.574833	0.86317	0.214693	0.724536	0.186403	0.803608	0.00714247	0.152594	0.145217	0.211037	0.00123635	Angle_between_D1-1D1-2_and_C1C4-1
D163_C	0.8712	0.251802	0.783747	6.70072e-06	0.0577684	0.93467	0.25705	0.0255784	0.862474	0.290232	0.788801	0.0424866	0.204555	0.281938	0.484682	0.000959333	Angle_between_D2-1D2-2_and_C1C4-1
D169_C	0.970297	0.500661	0.200668	1.41949e-08	0.478584	0.841387	0.688963	0.0784306	0.385556	0.006302	0.873307	0.109307	0.440081	0.629096	0.673858	0.000304007	Angle_between_C4-1D1-1_and_C4-1C1
D170_C	0.451272	0.792159	0.503642	5.13806e-08	0.305402	0.727042	0.690212	0.00302152	0.944115	0.138977	0.453444	0.915301	0.576702	0.467284	0.245857	7.31125e-06	Angle_between_C4-1D2-1_and_C4-1C1
CCV13_A	0.376759	0.570046	0.891912	0.879207	0.10343	0.839426	0.428622	0.830872	0.381857	0.000503636	0.00128545	0.615609	0.842937	0.11761	0.0867853	0.824497	Noise_of_whole_cell_fitness_for_ellipse
DCV15-1_C	0.764003	0.252662	0.158467	0.57679	0.775145	0.836759	0.973412	0.0667676	0.548927	0.35859	0.608787	0.0816631	0.00309056	0.664926	0.120446	0.152387	Noise_of_nuclear_brightness_in_mother
DCV15-3_A1B	0.0636443	0.688617	0.549093	0.477221	0.662156	0.672911	0.381866	7.47452e-05	0.912368	0.13611	0.131745	0.562113	0.128499	0.375383	0.816275	0.125226	Noise_of_nuclear_brightness
DCV119_C	0.151578	0.763057	0.16378	0.876965	0.897346	0.966272	0.757873	2.7564e-07	0.0503721	0.456467	0.855753	0.059875	0.581856	0.424514	0.941063	0.0588168	Noise_of_distance_between_nuclear_gravity_center_in_bud_and_bud_center
DCV137_C	0.0041737	0.275649	0.526229	0.315119	0.464198	0.418758	0.771175	2.09862e-05	0.0905433	0.931376	0.752694	0.0346674	0.675978	0.0938614	0.425794	0.167578	Noise_of_distance_between_nuclear_brightest_point_in_bud_and_bud_center
C124_C	0.474308	0.426912	0.406155	0.0113734	0.383133	0.351496	0.932314	2.13129e-05	0.736828	0.852	0.582631	0.0110143	0.591071	0.626403	0.335746	0.000105243	Medium_bud_ratio
DCV15-2_C	0.533898	0.528433	0.717693	0.0316903	0.412074	0.146554	0.762175	0.00180559	0.424817	0.551472	0.807178	0.0390899	0.413161	0.683337	0.264365	0.000123734	Noise_of_nuclear_brightness_in_bud
D17-2_C	0.269996	0.403254	0.487249	0.276901	0.129499	0.236719	0.610858	0.00595073	0.981515	0.737748	0.996976	0.0296504	0.74602	0.591549	0.339621	0.000595708	Nuclear_fitness_for_ellipse_in_bud
D151_C	0.334638	0.124378	0.324841	0.0802104	0.336127	0.62362	0.705528	0.0314559	0.739706	0.771167	0.726078	0.0281035	0.494919	0.794945	0.411013	0.000137092	Ratio_of_distance_between_each_nucleus_and_middle_point_of_neck
DCV149_C	0.354202	0.603131	0.303867	0.311733	0.564634	0.645808	0.550749	0.026839	0.0386004	0.201304	0.614575	0.000353149	0.315238	0.307331	0.811892	0.000502893	Noise_of_relative_distance_of_nuclear_gravity_center_in_bud_to_bud_center
DCV150_C	0.0501289	0.331983	0.750989	0.0456305	0.586531	0.208646	0.4815	0.0943654	0.112166	0.818154	0.564297	0.000302537	0.256076	0.0484867	0.855117	0.00141681	Noise_of_relative_distance_of_nuclear_brightest_point_in_bud_to_bud_center
